# Supplementary material for: Spatial variability of Middle East respiratory syndrome coronavirus survival rates and mortality hazard in Saudi Arabia, 2012–2019
Source: PeerJ journal article supplement (doi:10.7717/peerj.9783), 2020-08-12
Supplement: Appendix_Table_2.docx [file Appendix_Table_2.docx]

**Appendix Table 2.** Risk factors and estimated hazard ratios of 14- and 45-day mortality for MERS-CoV patients for each of the provinces between 2012 and 2019 from univariate Cox proportional-hazards (CPH) modeling.

|  | **14-day mortality** | | | **45-day mortality** | | |
| --- | --- | --- | --- | --- | --- | --- |
| **Provinces/Factors** | **HR** | **95% CI for HR** | **P** | **HR** | **95% CI for HR** | **P** |
| **Riyadh** |  |  |  |  |  |  |
| Male gender | 1.54 | 1.11-2.12 | 0.0082 | 1.39 | 1.08-1.80 | 0.0104 |
| Age 20-40 years | 0.35 | 0.20-0.60 | 0.0002 | 0.36 | 0.23-0.57 | <0.0001 |
| Age ≥ 61 years | 2.69 | 1.95-3.70 | <0.0001 | 2.47 | 1.90-3.20 | <0.0001 |
| Non-healthcare worker | 8.31 | 3.68-18.77 | <0.0001 | 7.00 | 3.72-13.16 | <0.0001 |
| With comorbidity | 13.68 | 6.42-29.13 | <0.0001 | 11.72 | 6.41-21.44 | <0.0001 |
| **Makkah** |  |  |  |  |  |  |
| Male gender | NV | NV | NV | 1.43 | 1.01-2.02 | 0.0401 |
| Age 41-60 years | 3.60 | 1.86-6.98 | 0.0001 | 3.46 | 2.11-5.68 | <0.0001 |
| Age ≥ 61 years | 10.77 | 5.74-20.17 | <0.0001 | 8.48 | 5.23-13.76 | <0.0001 |
| Non-healthcare worker | 53.41 | 7.44-383.11 | <0.0001 | 11.42 | 5.35-24.38 | <0.0001 |
| With comorbidity | 7.89 | 3.45-18.03 | <0.0001 | 6.58 | 3.47-12.49 | <0.0001 |
| **Madinah** |  |  |  |  |  |  |
| Age ≥ 61 years | 8.59 | 3.05-24.17 | <0.0001 | 7.89 | 3.38-18.37 | <0.0001 |
| **Eastern** |  |  |  |  |  |  |
| Age ≥ 61 years | 3.62 | 2.06-6.36 | <0.0001 | 2.58 | 1.68-3.97 | <0.0001 |
| Non-healthcare worker | NV | NV | NV | 5.93 | 1.45-24.14 | 0.0129 |
| With comorbidity | 4.30 | 1.70-10.84 | 0.0020 | 3.96 | 1.910-8.21 | 0.0002 |
| **Qassim** |  |  |  |  |  |  |
| With comorbidity | 3.9995 | 1.21-13.13 | 0.0224 | 3.20 | 1.14-8.98 | 0.0266 |
| **Tabuk** |  |  |  |  |  |  |
| Age ≥ 61 years | 13.9752 | 1.42-136.67 | 0.0234 | 7.65 | 1.75-33.40 | 0.0068 |
| Exposed to camel | 9.3648 | 1.28-68.27 | 0.0273 | 11.83 | 1.91-72.97 | 0.0078 |

NV: No variables were retained in this model. Note: No variables were retained in this model for the other provinces.
