# Supplementary material for: Spatial variability of Middle East respiratory syndrome coronavirus survival rates and mortality hazard in Saudi Arabia, 2012–2019
Source: PeerJ journal article supplement (doi:10.7717/peerj.9783), 2020-08-12
Supplement: Appendix_Table_4.docx [file Appendix_Table_4.docx]

**Appendix Table 4.** Estimated hazard ratios for provinces as covariates for 14- and 45-day mortality for MERS-CoV patients between 2012 and 2019 from univariate Cox proportional-hazards (CPH) modeling**.**

|  | **14-day mortality** | | | **45-day mortality** | | |
| --- | --- | --- | --- | --- | --- | --- |
| **Factors** | **HR** | **95% CI for HR** | **P** | **HR** | **95% CI for HR** | **P** |
| Qassim province | 2.12 | 1.48-3.05 | <0.0001 | NV | NV | NV |

NV: No variables were retained in this model.
