# Supplementary material for: Spatial variability of Middle East respiratory syndrome coronavirus survival rates and mortality hazard in Saudi Arabia, 2012–2019
Source: PeerJ journal article supplement (doi:10.7717/peerj.9783), 2020-08-12
Supplement: Rwa_data_June_4_2020-StaffSS.xlsx [file Rwa_data_June_4_2020-StaffSS.xlsx]

## Sheet: Sheet1
Regions	Gender	Age Category	Healthcare worker	Comorbidity	Exposure to camels	Outcomes	on 14-day mortality	on 45-day mortality
South	Male	41_60	No	Yes	No	Death	0	1
Central	Male	41_60	No	Yes	NA	Live	1	1
Central	Male	20_40	No	Yes	NA	Live	1	1
Central	Male	20_40	No	Yes	NA	Death	1	1
Central	Male	61_140	No	Yes	NA	Death	0	1
Central	Female	61_140	No	Yes	NA	Death	0	1
Central	Male	41_60	No	Yes	NA	Death	1	1
Central	Male	20_40	No	Yes	NA	Death	1	1
Central	Male	20_40	No	Yes	NA	Live	1	1
Central	Male	41_60	No	Yes	NA	Death	0	1
East	Male	61_140	No	Yes	No	Death	1	1
East	Male	20_40	No	Yes	No	Death	0	1
East	Male	41_60	No	Yes	NA	Death	1	1
East	Male	41_60	No	Yes	NA	Death	0	1
East	Male	61_140	No	Yes	NA	Death	1	1
East	Male	41_60	No	Yes	NA	Death	1	1
East	Male	41_60	No	Yes	NA	Death	1	1
East	Female	41_60	No	Yes	NA	Death	0	1
East	Male	41_60	No	Yes	No	Live	1	1
East	Male	20_40	No	Yes	NA	Live	1	1
East	Female	61_140	No	Yes	NA	Death	0	1
East	Male	61_140	No	Yes	NA	Death	0	1
East	Female	41_60	No	Yes	No	Live	1	1
East	Male	41_60	No	Yes	NA	Death	0	1
East	Male	61_140	No	Yes	No	Live	1	1
East	Female	61_140	No	Yes	NA	Death	0	1
East	Male	41_60	No	Yes	NA	Death	0	1
East	Male	41_60	No	Yes	NA	Death	0	1
East	Male	41_60	No	Yes	NA	Live	1	1
East	Male	41_60	Yes	Yes	NA	Death	0	1
East	Female	20_40	Yes	Yes	No	Live	1	1
East	Female	61_140	No	Yes	NA	Death	0	1
East	Male	61_140	No	Yes	NA	Death	1	1
East	Female	61_140	No	Yes	No	Live	1	1
East	Female	61_140	No	Yes	NA	Death	1	1
East	Male	61_140	No	Yes	NA	Death	1	1
East	Male	61_140	No	Yes	NA	Death	1	1
East	Male	41_60	No	Yes	NA	Live	1	1
East	Female	1_19	No	Yes	NA	Live	1	1
West	Male	41_60	No	Yes	NA	Death	0	1
East	Male	61_140	No	Yes	NA	Death	0	0
East	Male	20_40	No	Yes	NA	Death	0	0
East	Female	61_140	No	Yes	NA	Death	0	1
East	Male	61_140	No	Yes	NA	Death	0	1
Central	Male	41_60	No	Yes	NA	Death	1	1
West	Female	61_140	No	Yes	NA	Death	1	1
West	Female	20_40	Yes	Yes	No	Live	1	1
West	Female	41_60	Yes	Yes	No	Live	1	1
West	Male	1_19	No	Yes	NA	Death	0	1
Central	Female	61_140	No	Yes	NA	Death	0	1
East	Male	41_60	No	Yes	NA	Live	1	1
West	Female	20_40	Yes	No	No	Live	1	1
East	Male	41_60	No	Yes	NA	Death	0	1
East	Male	20_40	No	Yes	NA	Death	0	1
Central	Female	41_60	No	Yes	NA	Live	1	1
Central	Female	1_19	No	No	NA	Live	1	1
Central	Female	1_19	No	No	NA	Live	1	1
East	Female	20_40	Yes	No	No	Live	1	1
East	Female	41_60	Yes	No	NA	Live	1	1
East	Female	41_60	No	Yes	NA	Live	1	1
East	Male	1_19	No	No	NA	Live	1	1
East	Female	1_19	No	No	NA	Live	1	1
East	Female	41_60	Yes	No	NA	Live	1	1
Central	Male	61_140	No	Yes	NA	Live	1	1
Central	Male	61_140	No	Yes	NA	Death	0	1
South	Male	61_140	No	Yes	No	Death	0	1
Central	Male	41_60	No	Yes	NA	Death	1	1
East	Female	41_60	No	Yes	NA	Live	1	1
South	Male	20_40	No	No	No	Live	1	1
South	Female	41_60	Yes	Yes	No	Live	1	1
South	Male	61_140	No	Yes	No	Death	0	1
Central	Female	20_40	Yes	Yes	NA	Live	1	1
Central	Female	61_140	No	Yes	No	Death	1	1
South	Female	41_60	Yes	Yes	NA	Live	1	1
Central	Female	41_60	No	Yes	No	Death	0	1
South	Male	20_40	No	Yes	NA	Live	1	1
Central	Male	1_19	No	Yes	No	Death	0	1
Central	Female	41_60	No	Yes	NA	Live	1	1
South	Male	41_60	No	No	NA	Live	1	1
Central	Male	61_140	No	Yes	No	Death	0	1
Central	Male	41_60	No	Yes	NA	Death	0	0
East	Male	20_40	No	Yes	NA	Death	1	1
Central	Female	20_40	No	No	NA	Live	1	1
Central	Female	41_60	No	Yes	NA	Live	1	1
East	Female	61_140	No	Yes	NA	Death	1	1
East	Male	20_40	No	No	NA	Live	1	1
East	Male	1_19	No	No	NA	Live	1	1
East	Female	1_19	No	No	NA	Live	1	1
Central	Female	20_40	Yes	Yes	NA	Death	1	1
Central	Male	41_60	No	Yes	NA	Death	1	1
East	Male	41_60	No	Yes	NA	Death	0	1
West	Male	61_140	Yes	No	NA	Death	1	1
West	Male	61_140	Yes	Yes	NA	Death	0	1
Central	Male	20_40	No	No	NA	Live	1	1
Central	Male	41_60	No	Yes	NA	Death	1	1
Central	Male	20_40	Yes	Yes	NA	Live	1	1
East	Female	1_19	No	No	NA	Live	1	1
East	Male	1_19	No	No	NA	Live	1	1
West	Male	1_19	Yes	No	No	Live	1	1
East	Female	61_140	No	Yes	NA	Death	1	1
Central	Female	61_140	No	Yes	NA	Death	0	1
Central	Female	61_140	No	Yes	NA	Death	1	1
Central	Female	41_60	No	Yes	NA	Live	1	1
Central	Male	41_60	No	Yes	Yes	Live	1	1
Central	Male	41_60	No	Yes	Yes	Live	1	1
Central	Male	20_40	Yes	Yes	No	Live	1	1
West	Female	61_140	No	Yes	NA	Death	1	1
Central	Female	41_60	Yes	Yes	NA	Live	1	1
Central	Female	20_40	Yes	Yes	NA	Live	1	1
West	Male	20_40	No	Yes	NA	Live	1	1
Central	Male	1_19	No	Yes	NA	Death	1	1
Central	Female	61_140	No	Yes	NA	Death	0	1
Central	Male	61_140	No	Yes	Yes	Live	1	1
Central	Female	41_60	No	Yes	NA	Live	1	1
Central	Female	1_19	No	No	NA	Live	1	1
Central	Male	61_140	No	Yes	Yes	Live	1	1
Central	Male	61_140	No	Yes	NA	Death	0	1
Central	Male	61_140	No	Yes	NA	Death	0	1
Central	Male	41_60	No	Yes	NA	Death	1	1
East	Male	41_60	No	Yes	NA	Death	0	1
Central	Male	61_140	No	Yes	NA	Death	0	0
East	Male	41_60	No	Yes	NA	Live	1	1
East	Female	61_140	No	Yes	NA	Death	1	1
East	Male	41_60	Yes	Yes	NA	Live	1	1
East	Female	41_60	No	Yes	NA	Death	1	1
West	Male	41_60	No	Yes	Yes	Death	0	1
Central	Female	61_140	No	Yes	NA	Death	0	1
North	Male	41_60	Yes	Yes	NA	Death	1	1
Central	Male	20_40	No	Yes	NA	Death	1	1
Central	Female	20_40	Yes	No	NA	Live	1	1
North	Female	41_60	No	Yes	NA	Death	0	0
Central	Female	61_140	No	Yes	NA	Death	1	1
Central	Male	41_60	No	Yes	NA	Death	0	1
Central	Male	61_140	No	Yes	NA	Death	1	1
Central	Male	41_60	No	Yes	NA	Death	0	0
Central	Female	20_40	Yes	No	NA	Live	1	1
Central	Female	41_60	Yes	No	NA	Live	1	1
Central	Female	41_60	Yes	No	NA	Live	1	1
Central	Male	20_40	Yes	No	No	Live	1	1
Central	Male	20_40	Yes	No	No	Live	1	1
Central	Male	41_60	Yes	Yes	NA	Death	1	1
Central	Male	41_60	No	Yes	NA	Death	1	1
South	Male	61_140	No	Yes	NA	Live	1	1
Central	Female	61_140	No	Yes	NA	Death	0	1
East	Male	20_40	No	Yes	NA	Death	1	1
South	Female	41_60	Yes	Yes	NA	Death	1	1
Central	Female	41_60	No	Yes	NA	Death	0	1
Central	Male	41_60	No	Yes	NA	Death	1	1
Central	Male	41_60	No	Yes	NA	Death	1	1
Central	Male	61_140	No	No	Yes	Live	1	1
West	Male	61_140	No	Yes	Yes	Death	0	1
Central	Male	61_140	No	Yes	Yes	Live	1	1
Central	Male	1_19	No	Yes	NA	Death	1	1
Central	Male	61_140	No	Yes	Yes	Live	1	1
Central	Male	61_140	No	Yes	NA	Death	0	1
Central	Female	20_40	No	Yes	NA	Death	0	0
Central	Female	1_19	No	No	NA	Live	1	1
Central	Male	41_60	No	No	Yes	Live	1	1
Central	Male	41_60	No	Yes	Yes	Live	1	1
Central	Male	41_60	No	Yes	Yes	Live	1	1
Central	Male	61_140	No	Yes	NA	Death	1	1
Central	Male	41_60	No	Yes	NA	Death	1	1
West	Male	20_40	Yes	Yes	NA	Death	0	1
Central	Male	41_60	No	Yes	NA	Death	0	1
Central	Female	61_140	No	Yes	NA	Live	1	1
West	Male	20_40	Yes	Yes	NA	Live	1	1
South	Male	41_60	No	Yes	NA	Death	0	1
Central	Male	61_140	No	Yes	NA	Death	1	1
Central	Male	41_60	No	Yes	Yes	Live	1	1
West	Male	41_60	Yes	Yes	NA	Live	1	1
West	Male	61_140	No	Yes	NA	Death	1	1
West	Male	61_140	No	Yes	NA	Death	0	1
West	Male	20_40	No	No	Yes	Live	1	1
West	Male	41_60	No	Yes	NA	Live	1	1
West	Male	20_40	Yes	Yes	NA	Live	1	1
West	Male	41_60	No	Yes	NA	Death	0	1
West	Female	20_40	Yes	No	NA	Live	1	1
West	Male	20_40	Yes	Yes	NA	Live	1	1
West	Male	20_40	No	Yes	Yes	Live	1	1
West	Male	20_40	Yes	Yes	NA	Live	1	1
West	Female	20_40	Yes	No	NA	Live	1	1
West	Male	20_40	No	No	Yes	Live	1	1
West	Male	20_40	Yes	Yes	NA	Live	1	1
Central	Male	61_140	No	Yes	NA	Death	0	1
West	Male	41_60	No	Yes	NA	Death	0	1
West	Male	61_140	No	Yes	NA	Death	1	1
West	Male	20_40	Yes	Yes	No	Live	1	1
West	Female	20_40	Yes	No	No	Live	1	1
West	Male	20_40	Yes	No	No	Live	1	1
West	Male	41_60	No	Yes	No	Live	1	1
West	Male	41_60	No	Yes	NO	Death	0	1
West	Male	41_60	No	Yes	NA	Death	1	1
West	Male	41_60	No	Yes	NA	Death	0	1
Central	Male	41_60	No	Yes	Yes	Live	1	1
Central	Female	41_60	No	Yes	NA	Death	1	1
West	Male	61_140	No	Yes	NA	Death	1	1
West	Male	20_40	No	Yes	No	Live	1	1
West	Male	20_40	No	Yes	No	Live	1	1
West	Male	41_60	No	Yes	NO	Death	1	1
West	Male	61_140	No	Yes	NA	Death	1	1
West	Male	41_60	Yes	Yes	No	Live	1	1
West	Male	61_140	No	Yes	NA	Death	1	1
West	Female	20_40	Yes	No	No	Live	1	1
West	Female	20_40	Yes	No	NA	Live	1	1
West	Female	20_40	Yes	No	NA	Live	1	1
West	Female	20_40	Yes	No	NA	Live	1	1
West	Female	20_40	Yes	No	NA	Live	1	1
West	Male	41_60	No	Yes	NA	Death	0	1
West	Male	20_40	Yes	No	NA	Live	1	1
West	Male	20_40	No	Yes	NA	Death	1	1
West	Male	20_40	No	Yes	NO	Death	1	1
Central	Male	20_40	No	Yes	NA	Death	1	1
West	Female	61_140	No	Yes	NA	Death	1	1
West	Male	20_40	Yes	No	NA	Live	1	1
Central	Male	61_140	No	Yes	Yes	Live	1	1
West	Female	20_40	No	Yes	NA	Live	1	1
Central	Male	20_40	No	Yes	Yes	Live	1	1
West	Male	41_60	No	Yes	NO	Death	1	1
West	Male	41_60	Yes	Yes	NA	Live	1	1
West	Female	61_140	No	Yes	NA	Death	0	1
West	Female	20_40	No	Yes	NA	Live	1	1
West	Male	41_60	Yes	No	NA	Live	1	1
West	Female	61_140	No	Yes	NA	Live	1	1
West	Female	20_40	Yes	No	NA	Live	1	1
West	Male	41_60	No	Yes	NA	Live	1	1
Central	Male	61_140	No	Yes	NA	Death	1	1
West	Female	20_40	No	No	NA	Live	1	1
West	Male	1_19	No	No	NA	Live	1	1
West	Female	41_60	Yes	Yes	NA	Live	1	1
West	Female	41_60	Yes	Yes	NA	Live	1	1
West	Male	20_40	Yes	Yes	NA	Live	1	1
West	Male	20_40	No	Yes	NA	Death	0	1
West	Female	41_60	No	Yes	NO	Death	1	1
West	Female	20_40	No	Yes	NA	Death	0	1
West	Male	41_60	No	Yes	NA	Death	1	1
West	Male	20_40	No	Yes	NA	Death	1	1
West	Male	41_60	No	Yes	NA	Live	1	1
West	Male	41_60	No	Yes	NA	Death	1	1
West	Male	41_60	No	Yes	NA	Live	1	1
Central	Male	41_60	Yes	Yes	No	Live	1	1
South	Male	61_140	No	Yes	NA	Death	1	1
Central	Female	61_140	No	Yes	NA	Death	0	1
Central	Male	61_140	No	Yes	NA	Death	1	1
West	Male	61_140	No	Yes	NO	Death	1	1
Central	Male	61_140	No	Yes	NA	Live	1	1
Central	Female	61_140	No	Yes	NA	Death	1	1
Central	Male	61_140	No	Yes	NA	Death	1	1
East	Male	61_140	Yes	Yes	NA	Live	1	1
Central	Male	61_140	No	Yes	NA	Death	1	1
Central	Female	61_140	No	Yes	NA	Death	1	1
West	Male	41_60	No	Yes	NA	Live	1	1
West	Female	41_60	Yes	Yes	NA	Live	1	1
West	Male	20_40	No	No	NA	Live	1	1
West	Male	1_19	No	No	NA	Live	1	1
Central	Male	61_140	No	Yes	NA	Death	0	1
Central	Female	20_40	Yes	Yes	NA	Live	1	1
North	Male	20_40	No	Yes	NA	Death	0	1
West	Male	41_60	No	Yes	NA	Live	1	1
West	Male	61_140	No	Yes	NA	Death	0	1
West	Female	1_19	No	Yes	NA	Live	1	1
West	Male	1_19	No	Yes	NA	Live	1	1
West	Male	20_40	No	Yes	NA	Live	1	1
West	Male	20_40	Yes	Yes	NA	Live	1	1
Central	Male	20_40	No	Yes	NA	Live	1	1
Central	Female	41_60	No	Yes	NA	Death	0	1
West	Female	1_19	No	No	NA	Live	1	1
West	Male	61_140	No	Yes	NA	Live	1	1
West	Male	61_140	No	Yes	NA	Death	0	1
West	Male	41_60	Yes	Yes	NA	Death	0	1
West	Male	41_60	No	Yes	NO	Death	0	1
West	Male	41_60	Yes	Yes	NA	Live	1	1
West	Male	20_40	Yes	Yes	NA	Live	1	1
West	Female	61_140	No	Yes	NA	Death	0	1
West	Male	61_140	No	No	NA	Live	1	1
Central	Male	61_140	No	Yes	NA	Death	1	1
Central	Female	61_140	No	Yes	NA	Death	1	1
Central	Male	61_140	No	Yes	NA	Death	0	1
Central	Female	61_140	No	Yes	NA	Death	1	1
Central	Male	61_140	No	Yes	NA	Death	0	1
West	Male	61_140	No	Yes	NA	Death	1	1
West	Male	61_140	No	Yes	NA	Death	1	1
Central	Male	61_140	No	Yes	NA	Live	1	1
West	Male	41_60	No	Yes	NO	Death	1	1
West	Male	1_19	No	Yes	NA	Live	1	1
North	Male	20_40	No	Yes	NA	Death	0	1
Central	Male	41_60	Yes	Yes	NA	Death	0	1
West	Male	20_40	No	Yes	NA	Death	0	1
West	Male	41_60	No	Yes	NA	Live	1	1
West	Male	41_60	Yes	No	NA	Live	1	1
West	Male	41_60	No	Yes	NA	Live	1	1
West	Male	61_140	No	Yes	NA	Death	1	1
West	Female	20_40	No	No	NA	Death	1	1
West	Male	1_19	No	Yes	NA	Live	1	1
West	Female	20_40	Yes	Yes	NA	Live	1	1
Central	Male	61_140	No	Yes	NA	Death	1	1
Central	Female	20_40	Yes	Yes	NA	Live	1	1
Central	Male	61_140	No	Yes	NA	Death	1	1
Central	Male	41_60	No	Yes	NA	Live	1	1
Central	Male	41_60	No	Yes	NA	Death	1	1
Central	Male	61_140	No	Yes	NA	Death	1	1
Central	Female	61_140	No	Yes	NA	Death	0	1
West	Male	41_60	No	Yes	NA	Death	0	1
West	Female	20_40	Yes	No	NA	Live	1	1
West	Male	20_40	No	Yes	NA	Death	0	0
West	Male	20_40	No	Yes	NA	Live	1	1
West	Male	41_60	No	Yes	NA	Live	1	1
West	Male	41_60	No	Yes	NA	Death	1	1
West	Male	41_60	No	Yes	NA	Death	1	1
West	Female	20_40	Yes	No	NA	Live	1	1
West	Female	20_40	No	Yes	NA	Death	1	1
West	Male	20_40	Yes	Yes	NA	Live	1	1
West	Male	20_40	No	Yes	NA	Live	1	1
Central	Female	20_40	Yes	No	NA	Live	1	1
Central	Male	61_140	No	Yes	NA	Death	1	1
Central	Female	20_40	Yes	Yes	NA	Live	1	1
West	Male	20_40	Yes	Yes	NA	Live	1	1
West	Male	20_40	No	Yes	NA	Live	1	1
West	Male	20_40	No	Yes	NA	Live	1	1
West	Female	20_40	No	Yes	NA	Live	1	1
West	Male	41_60	No	Yes	NA	Death	1	1
West	Female	61_140	No	Yes	NA	Death	1	1
West	Male	41_60	No	Yes	NA	Live	1	1
West	Male	41_60	No	Yes	NA	Live	1	1
Central	Male	1_19	No	Yes	NA	Death	1	1
Central	Female	20_40	No	Yes	NA	Live	1	1
North	Male	20_40	Yes	No	NA	Live	1	1
North	Male	20_40	Yes	No	No	Live	1	1
North	Female	20_40	Yes	No	No	Live	1	1
North	Female	20_40	Yes	No	No	Live	1	1
Central	Female	41_60	Yes	Yes	NA	Live	1	1
North	Male	20_40	Yes	No	No	Live	1	1
West	Female	41_60	Yes	Yes	NA	Live	1	1
West	Female	61_140	No	Yes	NA	Death	1	1
West	Male	41_60	No	Yes	NA	Death	1	1
West	Female	61_140	No	Yes	NA	Death	1	1
West	Female	41_60	Yes	Yes	NA	Live	1	1
West	Male	41_60	No	Yes	NA	Live	1	1
West	Male	41_60	Yes	Yes	NA	Live	1	1
West	Male	41_60	No	Yes	NA	Death	1	1
Central	Female	61_140	No	Yes	NA	Live	1	1
North	Male	20_40	No	Yes	No	Live	1	1
West	Female	1_19	No	No	NA	Live	1	1
West	Male	41_60	No	Yes	NA	Live	1	1
West	Female	20_40	No	No	NA	Live	1	1
West	Male	20_40	No	Yes	NA	Live	1	1
Central	Male	61_140	No	Yes	NA	Live	1	1
Central	Male	41_60	No	Yes	NA	Live	1	1
Central	Male	61_140	No	Yes	NA	Death	0	1
North	Male	61_140	No	Yes	NA	Death	1	1
Central	Male	61_140	No	Yes	NA	Death	0	1
Central	Female	41_60	Yes	Yes	NA	Live	1	1
Central	Female	41_60	Yes	Yes	NA	Live	1	1
North	Male	20_40	No	Yes	NA	Death	0	1
North	Male	41_60	No	Yes	No	Live	1	1
West	Female	20_40	Yes	Yes	No	Live	1	1
West	Male	41_60	No	Yes	NA	Death	1	1
West	Female	61_140	No	Yes	NA	Death	1	1
West	Female	61_140	No	Yes	NA	Death	0	1
South	Male	61_140	No	Yes	NA	Live	1	1
East	Female	1_19	No	No	NA	Live	1	1
West	Male	41_60	Yes	Yes	No	Live	1	1
Central	Male	20_40	Yes	No	NA	Live	1	1
Central	Male	41_60	No	Yes	NA	Live	1	1
Central	Female	20_40	Yes	No	NA	Live	1	1
West	Male	20_40	No	Yes	No	Live	1	1
West	Male	20_40	Yes	Yes	NA	Death	0	1
West	Female	41_60	No	Yes	NA	Death	1	1
West	Female	41_60	No	Yes	NA	Death	1	1
West	Female	61_140	No	Yes	NA	Death	0	1
West	Male	41_60	No	Yes	NA	Death	0	1
West	Female	61_140	No	Yes	No	Live	1	1
Central	Female	20_40	Yes	Yes	No	Live	1	1
Central	Female	20_40	Yes	Yes	No	Live	1	1
Central	Male	20_40	Yes	Yes	NA	Live	1	1
Central	Female	41_60	No	Yes	NA	Death	1	1
West	Female	20_40	No	Yes	No	Live	1	1
West	Female	20_40	Yes	Yes	NA	Live	1	1
West	Male	41_60	Yes	Yes	No	Death	0	1
Central	Female	20_40	Yes	Yes	NA	Live	1	1
Central	Female	1_19	No	Yes	NA	Live	1	1
Central	Female	61_140	No	Yes	NA	Death	0	1
Central	Male	61_140	No	Yes	NA	Death	0	1
Central	Female	61_140	No	Yes	NA	Death	0	1
West	Male	41_60	Yes	Yes	NA	Live	1	1
West	Male	61_140	No	Yes	No	Death	1	1
West	Male	41_60	No	Yes	NA	Live	1	1
West	Male	20_40	No	Yes	NA	Live	1	1
West	Female	41_60	No	Yes	No	Death	1	1
West	Male	20_40	No	Yes	No	Death	1	1
West	Male	41_60	No	No	NA	Live	1	1
West	Male	20_40	Yes	Yes	NA	Live	1	1
West	Male	20_40	Yes	Yes	NA	Live	1	1
West	Female	61_140	No	Yes	No	Death	1	1
West	Female	20_40	Yes	No	NA	Live	1	1
West	Male	20_40	No	Yes	No	Death	1	1
West	Male	41_60	No	Yes	NA	Death	1	1
Central	Female	41_60	Yes	Yes	NA	Death	0	1
Central	Female	41_60	No	Yes	NA	Live	1	1
Central	Male	61_140	No	Yes	NA	Death	1	1
Central	Female	41_60	No	Yes	NA	Death	1	1
Central	Male	20_40	No	Yes	NA	Live	1	1
Central	Male	41_60	No	No	NA	Live	1	1
West	Male	61_140	No	Yes	NA	Death	1	1
West	Male	61_140	No	Yes	NA	Live	1	1
West	Male	61_140	No	Yes	NA	Live	1	1
West	Male	61_140	No	Yes	NA	Death	0	1
West	Female	20_40	No	Yes	NA	Live	1	1
West	Female	20_40	Yes	No	NA	Live	1	1
West	Female	20_40	Yes	No	NA	Live	1	1
West	Female	20_40	Yes	No	NA	Live	1	1
West	Male	1_19	No	No	NA	Live	1	1
Central	Female	41_60	No	Yes	NA	Death	0	1
Central	Female	41_60	No	Yes	NA	Live	1	1
West	Male	61_140	No	Yes	NA	Death	1	1
Central	Female	41_60	Yes	No	NA	Live	1	1
Central	Female	20_40	Yes	Yes	NA	Live	1	1
West	Female	61_140	No	Yes	NA	Death	1	1
South	Male	41_60	No	Yes	NA	Live	1	1
Central	Female	41_60	No	Yes	NA	Live	1	1
West	Male	41_60	No	Yes	NA	Death	1	1
West	Female	20_40	Yes	No	NA	Live	1	1
Central	Female	20_40	No	Yes	NA	Live	1	1
Central	Female	41_60	Yes	Yes	NA	Live	1	1
Central	Female	20_40	Yes	Yes	NA	Live	1	1
Central	Female	20_40	No	Yes	NA	Death	0	1
West	Male	61_140	No	Yes	NA	Death	1	1
West	Female	41_60	No	Yes	NA	Live	1	1
West	Female	41_60	No	No	NA	Live	1	1
West	Female	61_140	No	Yes	NA	Death	1	1
West	Male	41_60	Yes	Yes	NA	Live	1	1
West	Male	61_140	No	Yes	NA	Death	1	1
Central	Male	61_140	No	Yes	NA	Live	1	1
Central	Female	41_60	No	Yes	NA	Death	1	1
Central	Female	20_40	No	Yes	NA	Live	1	1
Central	Female	20_40	Yes	Yes	NA	Live	1	1
Central	Male	20_40	Yes	Yes	NA	Live	1	1
West	Female	20_40	Yes	Yes	NA	Death	0	1
West	Female	20_40	Yes	No	NA	Live	1	1
West	Female	20_40	Yes	No	NA	Live	1	1
West	Male	20_40	Yes	No	NA	Live	1	1
West	Male	41_60	No	Yes	NA	Death	0	1
West	Male	1_19	No	Yes	NA	Live	1	1
West	Male	20_40	Yes	Yes	NA	Live	1	1
West	Male	41_60	No	Yes	No	Live	1	1
West	Male	61_140	No	Yes	NA	Death	1	1
West	Male	41_60	Yes	Yes	No	Live	1	1
West	Male	61_140	Yes	Yes	No	Live	1	1
West	Male	61_140	No	Yes	NA	Death	1	1
South	Male	20_40	No	Yes	NA	Live	1	1
West	Male	41_60	No	Yes	NA	Death	1	1
West	Male	20_40	No	No	No	Live	1	1
West	Male	61_140	No	Yes	Yes	Live	1	1
West	Male	41_60	No	Yes	NA	Death	0	1
Central	Female	41_60	No	Yes	NA	Live	1	1
Central	Male	20_40	Yes	Yes	NA	Live	1	1
Central	Male	61_140	No	Yes	NA	Live	1	1
Central	Female	41_60	Yes	Yes	NA	Live	1	1
Central	Female	41_60	No	Yes	NA	Death	0	1
Central	Male	20_40	No	Yes	NA	Death	1	1
South	Female	20_40	No	Yes	NA	Live	1	1
Central	Female	61_140	No	Yes	NA	Death	1	1
Central	Female	61_140	No	Yes	NA	Death	1	1
West	Male	61_140	No	Yes	NA	Death	1	1
Central	Female	20_40	Yes	No	NA	Live	1	1
Central	Female	61_140	No	Yes	NA	Death	1	1
Central	Female	20_40	Yes	No	NA	Live	1	1
Central	Female	20_40	Yes	Yes	NA	Live	1	1
Central	Female	20_40	No	Yes	NA	Live	1	1
West	Female	20_40	Yes	No	No	Live	1	1
West	Male	20_40	Yes	No	No	Live	1	1
West	Female	20_40	Yes	No	No	Live	1	1
West	Female	20_40	No	Yes	No	Live	1	1
West	Male	20_40	Yes	No	No	Live	1	1
Central	Male	20_40	Yes	No	NA	Live	1	1
Central	Male	20_40	Yes	No	NA	Live	1	1
Central	Female	20_40	Yes	Yes	NA	Live	1	1
Central	Female	41_60	No	Yes	NA	Death	1	1
West	Male	41_60	No	Yes	NA	Death	1	1
West	Female	61_140	No	Yes	NA	Death	1	1
West	Female	41_60	No	No	No	Live	1	1
Central	Female	41_60	Yes	Yes	NA	Live	1	1
West	Female	61_140	No	Yes	NA	Death	1	1
West	Female	41_60	Yes	Yes	No	Live	1	1
Central	Female	41_60	Yes	Yes	NA	Live	1	1
Central	Male	41_60	No	Yes	NA	Death	1	1
Central	Female	61_140	No	Yes	NA	Live	1	1
Central	Female	61_140	No	Yes	NA	Death	1	1
West	Female	41_60	Yes	Yes	No	Live	1	1
West	Male	20_40	Yes	Yes	NA	Death	0	1
West	Male	20_40	No	Yes	NA	Death	0	1
West	Male	61_140	No	Yes	NA	Death	1	1
Central	Female	20_40	Yes	No	NA	Live	1	1
Central	Female	20_40	Yes	No	NA	Live	1	1
Central	Male	61_140	No	Yes	NA	Death	1	1
Central	Female	20_40	No	Yes	NA	Live	1	1
Central	Male	20_40	Yes	No	NA	Live	1	1
Central	Female	41_60	No	Yes	NA	Death	1	1
Central	Female	61_140	No	Yes	No	Death	1	1
Central	Male	61_140	No	Yes	Yes	Death	0	1
Central	Female	41_60	No	Yes	No	Death	0	1
Central	Female	41_60	Yes	No	NA	Live	1	1
Central	Male	61_140	No	Yes	NA	Death	0	1
Central	Female	20_40	No	Yes	NA	Live	1	1
Central	Female	20_40	Yes	No	NA	Live	1	1
West	Female	41_60	Yes	Yes	No	Live	1	1
West	Female	41_60	No	Yes	NA	Death	0	1
West	Male	41_60	Yes	Yes	No	Live	1	1
West	Male	41_60	No	Yes	Yes	Live	1	1
West	Female	20_40	Yes	Yes	No	Live	1	1
West	Female	1_19	No	Yes	No	Live	1	1
West	Female	41_60	Yes	Yes	No	Live	1	1
Central	Female	41_60	No	Yes	NA	Death	1	1
Central	Female	61_140	No	No	NA	Live	1	1
Central	Female	20_40	No	Yes	NA	Live	1	1
Central	Male	1_19	No	Yes	NA	Death	0	1
Central	Male	20_40	No	Yes	NA	Live	1	1
West	Male	61_140	No	Yes	NA	Death	0	1
West	Female	61_140	No	Yes	NA	Death	0	1
West	Female	20_40	No	Yes	No	Live	1	1
West	Female	20_40	Yes	Yes	No	Live	1	1
Central	Female	20_40	No	Yes	NA	Live	1	1
Central	Male	20_40	Yes	Yes	NA	Live	1	1
West	Female	41_60	No	Yes	No	Live	1	1
West	Female	20_40	No	Yes	No	Live	1	1
West	Male	20_40	No	Yes	Yes	Live	1	1
West	Male	20_40	No	Yes	Yes	Live	1	1
West	Male	20_40	No	Yes	No	Live	1	1
West	Female	20_40	Yes	No	No	Live	1	1
West	Male	41_60	No	Yes	NA	Death	1	1
Central	Female	41_60	Yes	Yes	NA	Live	1	1
West	Male	20_40	No	Yes	No	Live	1	1
West	Male	20_40	No	Yes	NA	Death	0	1
Central	Male	41_60	No	No	NA	Live	1	1
Central	Male	20_40	No	No	NA	Live	1	1
West	Male	20_40	No	Yes	No	Live	1	1
West	Male	41_60	No	No	No	Live	1	1
West	Male	41_60	No	Yes	NA	Death	1	1
West	Male	20_40	No	No	No	Live	1	1
West	Female	61_140	No	Yes	NA	Death	1	1
Central	Male	20_40	Yes	No	NA	Live	1	1
West	Male	41_60	No	Yes	No	Live	1	1
West	Male	41_60	Yes	Yes	No	Live	1	1
West	Male	61_140	No	Yes	NA	Death	0	1
West	Male	20_40	No	No	No	Live	1	1
West	Female	41_60	Yes	Yes	No	Live	1	1
West	Female	61_140	No	Yes	NA	Death	1	1
West	Male	61_140	No	Yes	NA	Death	1	1
West	Male	20_40	No	Yes	No	Live	1	1
West	Male	61_140	No	No	No	Live	1	1
Central	Female	20_40	No	No	No	Live	1	1
West	Male	61_140	No	Yes	NA	Death	0	1
West	Female	20_40	No	No	No	Live	1	1
West	Male	1_19	No	Yes	No	Live	1	1
West	Male	41_60	No	No	No	Live	1	1
West	Male	41_60	No	Yes	NA	Death	0	1
West	Male	20_40	No	No	No	Live	1	1
West	Male	20_40	No	No	No	Live	1	1
Central	Female	61_140	No	Yes	NA	Death	1	1
West	Male	1_19	No	No	No	Live	1	1
West	Female	1_19	Yes	No	No	Live	1	1
Central	Female	20_40	Yes	No	No	Live	1	1
West	Female	41_60	No	Yes	NA	Death	1	1
West	Male	61_140	No	Yes	NA	Death	1	1
West	Female	20_40	No	Yes	NA	Death	1	1
Central	Male	61_140	No	Yes	Yes	Live	1	1
Central	Male	41_60	No	Yes	Yes	Live	1	1
West	Male	41_60	No	Yes	No	Live	1	1
East	Male	61_140	No	Yes	NA	Live	1	1
West	Male	20_40	No	Yes	No	Live	1	1
West	Male	41_60	No	Yes	No	Live	1	1
West	Male	41_60	Yes	Yes	No	Live	1	1
North	Male	1_19	No	Yes	No	Death	1	1
West	Female	41_60	No	Yes	NA	Death	1	1
West	Male	20_40	No	Yes	No	Live	1	1
West	Male	41_60	No	Yes	No	Live	1	1
West	Male	41_60	No	Yes	No	Live	1	1
North	Female	20_40	Yes	Yes	No	Live	1	1
East	Male	41_60	No	Yes	NA	Live	1	1
West	Male	20_40	No	No	No	Live	1	1
Central	Male	61_140	No	Yes	Yes	Live	1	1
North	Male	20_40	No	No	No	Live	1	1
North	Male	20_40	No	No	No	Live	1	1
North	Male	20_40	No	No	NA	Live	1	1
North	Female	20_40	Yes	No	NA	Live	1	1
East	Male	41_60	No	Yes	NA	Live	1	1
West	Male	61_140	No	Yes	No	Live	1	1
West	Male	20_40	Yes	Yes	No	Live	1	1
South	Male	20_40	No	Yes	NA	Live	1	1
West	Male	61_140	No	Yes	NA	Death	1	1
North	Female	20_40	Yes	No	NA	Live	1	1
South	Male	61_140	No	Yes	NA	Death	1	1
West	Male	20_40	Yes	Yes	No	Live	1	1
West	Male	20_40	No	Yes	No	Live	1	1
Central	Male	61_140	Yes	Yes	NA	Death	1	1
West	Male	61_140	No	Yes	NA	Death	1	1
Central	Male	41_60	Yes	No	No	Live	1	1
Central	Male	20_40	No	Yes	NA	Live	1	1
Central	Male	20_40	No	Yes	NA	Death	1	1
Central	Male	20_40	No	Yes	NA	Live	1	1
Central	Male	41_60	No	Yes	NA	Live	1	1
Central	Male	41_60	No	Yes	NA	Death	1	1
West	Male	41_60	No	Yes	NA	Death	0	1
West	Male	20_40	No	Yes	NA	Death	1	1
Central	Male	1_19	No	Yes	NA	Live	1	1
East	Male	41_60	No	Yes	NA	Live	1	1
Central	Female	61_140	Yes	No	NA	Live	1	1
Central	Female	20_40	Yes	No	NA	Live	1	1
Central	Male	41_60	No	Yes	NA	Death	1	1
East	Male	41_60	No	Yes	NA	Live	1	1
Central	Female	1_19	No	Yes	NA	Death	1	1
East	Female	41_60	Yes	No	NA	Live	1	1
North	Male	61_140	No	Yes	No	Death	0	1
Central	Male	20_40	Yes	Yes	NA	Death	1	1
West	Male	20_40	No	Yes	No	Live	1	1
Central	Male	61_140	No	Yes	NA	Death	1	1
Central	Male	41_60	No	Yes	NA	Live	1	1
West	Male	41_60	No	Yes	No	Live	1	1
West	Male	20_40	No	Yes	No	Live	1	1
West	Male	41_60	Yes	Yes	No	Live	1	1
West	Male	41_60	No	Yes	No	Live	1	1
West	Female	41_60	No	Yes	No	Live	1	1
Central	Female	61_140	No	Yes	NA	Death	1	1
Central	Male	1_19	No	No	NA	Live	1	1
Central	Female	20_40	No	No	NA	Live	1	1
Central	Male	20_40	No	Yes	NA	Live	1	1
Central	Female	61_140	No	Yes	NA	Death	0	1
Central	Male	41_60	No	Yes	NA	Live	1	1
Central	Male	41_60	No	Yes	NA	Live	1	1
Central	Male	1_19	No	Yes	NA	Live	1	1
West	Female	41_60	No	Yes	No	Death	1	1
Central	Male	41_60	Yes	Yes	NA	Live	1	1
Central	Female	20_40	Yes	No	NA	Live	1	1
West	Female	20_40	Yes	No	No	Live	1	1
West	Male	41_60	Yes	Yes	No	Live	1	1
Central	Female	20_40	Yes	No	NA	Live	1	1
Central	Female	20_40	Yes	No	NA	Live	1	1
Central	Female	20_40	Yes	No	NA	Live	1	1
Central	Female	20_40	Yes	No	NA	Live	1	1
Central	Female	20_40	Yes	No	NA	Live	1	1
Central	Female	20_40	Yes	No	NA	Live	1	1
West	Male	41_60	No	Yes	No	Death	1	1
West	Male	41_60	Yes	Yes	No	Live	1	1
West	Female	20_40	No	Yes	No	Live	1	1
Central	Male	61_140	No	Yes	NA	Live	1	1
Central	Female	20_40	Yes	No	NA	Live	1	1
Central	Male	61_140	No	Yes	NA	Death	1	1
South	Female	20_40	Yes	Yes	NA	Live	1	1
Central	Male	1_19	No	Yes	NA	Death	0	1
Central	Female	61_140	No	Yes	NA	Death	0	0
West	Male	41_60	Yes	Yes	No	Live	1	1
West	Male	61_140	No	Yes	No	Death	1	1
Central	Female	41_60	Yes	No	NA	Live	1	1
West	Female	20_40	Yes	Yes	No	Live	1	1
West	Male	41_60	No	Yes	No	Death	0	1
West	Male	20_40	No	No	No	Death	1	1
West	Male	41_60	No	Yes	No	Live	1	1
West	Female	20_40	Yes	Yes	No	Live	1	1
West	Male	61_140	No	No	No	Death	1	1
West	Male	61_140	No	Yes	No	Death	0	1
West	Female	1_19	No	No	No	Live	1	1
West	Female	20_40	Yes	Yes	No	Live	1	1
West	Male	41_60	Yes	No	No	Live	1	1
West	Male	41_60	No	Yes	No	Live	1	1
West	Male	20_40	No	Yes	No	Live	1	1
West	Female	20_40	No	Yes	No	Death	1	1
West	Female	20_40	No	Yes	No	Live	1	1
West	Female	20_40	Yes	No	No	Live	1	1
Central	Male	20_40	No	Yes	NA	Live	1	1
West	Female	41_60	Yes	Yes	No	Live	1	1
West	Male	1_19	No	No	No	Death	1	1
West	Male	20_40	Yes	Yes	No	Live	1	1
West	Female	20_40	Yes	Yes	No	Live	1	1
West	Male	61_140	No	Yes	No	Death	1	1
West	Male	20_40	Yes	Yes	No	Live	1	1
West	Male	41_60	No	Yes	No	Live	1	1
West	Female	20_40	Yes	Yes	No	Live	1	1
West	Female	20_40	No	Yes	No	Death	1	1
West	Male	61_140	No	Yes	No	Death	0	1
West	Male	20_40	No	Yes	No	Live	1	1
West	Female	61_140	No	Yes	No	Live	1	1
West	Male	41_60	No	Yes	No	Live	1	1
West	Male	20_40	Yes	Yes	No	Live	1	1
West	Male	41_60	Yes	Yes	No	Live	1	1
West	Female	41_60	Yes	Yes	No	Live	1	1
West	Female	1_19	No	Yes	No	Live	1	1
West	Female	20_40	Yes	Yes	No	Live	1	1
West	Female	61_140	No	Yes	No	Live	1	1
West	Male	61_140	No	Yes	No	Death	1	1
West	Male	20_40	Yes	Yes	No	Live	1	1
Central	Female	61_140	No	No	NA	Death	1	1
West	Female	41_60	Yes	Yes	No	Live	1	1
Central	Male	41_60	No	Yes	NA	Live	1	1
Central	Female	41_60	No	No	NA	Live	1	1
Central	Male	20_40	No	No	NA	Live	1	1
Central	Female	1_19	No	No	NA	Live	1	1
Central	Female	20_40	No	No	NA	Live	1	1
Central	Female	1_19	No	No	NA	Live	1	1
West	Female	41_60	No	Yes	No	Death	1	1
Central	Female	20_40	Yes	No	NA	Live	1	1
Central	Female	41_60	Yes	No	NA	Live	1	1
Central	Female	20_40	No	No	NA	Live	1	1
Central	Female	41_60	No	No	NA	Live	1	1
Central	Male	61_140	No	Yes	NA	Live	1	1
Central	Male	61_140	No	Yes	NA	Live	1	1
Central	Male	41_60	No	No	NA	Live	1	1
Central	Male	41_60	No	Yes	Yes	Live	1	1
Central	Male	61_140	No	Yes	NA	Live	1	1
South	Male	61_140	No	Yes	Yes	Live	1	1
South	Female	61_140	No	Yes	NA	Live	1	1
Central	Male	61_140	No	Yes	NA	Live	1	1
Central	Male	61_140	No	Yes	NA	Live	1	1
Central	Male	61_140	No	Yes	NA	Live	1	1
Central	Male	61_140	No	Yes	NA	Live	1	1
South	Male	20_40	No	Yes	Yes	Live	1	1
Central	Male	41_60	No	Yes	NA	Live	1	1
Central	Male	41_60	No	Yes	Yes	Live	1	1
Central	Male	20_40	No	No	Yes	Live	1	1
East	Male	20_40	No	Yes	NA	Live	1	1
West	Male	41_60	No	Yes	Yes	Live	1	1
West	Female	61_140	No	Yes	NA	Live	1	1
North	Male	41_60	No	Yes	Yes	Live	1	1
Central	Male	61_140	No	Yes	Yes	Live	1	1
Central	Male	41_60	No	Yes	Yes	Live	1	1
Central	Female	61_140	No	Yes	No	Live	1	1
East	Male	41_60	No	Yes	Yes	Live	1	1
Central	Male	41_60	No	Yes	Yes	Live	1	1
North	Female	20_40	No	Yes	NA	Live	1	1
North	Male	41_60	No	No	NA	Live	1	1
North	Male	41_60	No	Yes	NA	Live	1	1
North	Female	20_40	No	Yes	NA	Live	1	1
North	Female	41_60	No	Yes	NA	Live	1	1
Central	Male	41_60	No	No	NA	Live	1	1
South	Male	20_40	No	No	Yes	Live	1	1
Central	Male	20_40	No	Yes	Yes	Live	1	1
West	Female	41_60	No	Yes	No	Live	1	1
North	Male	1_19	No	No	NA	Live	1	1
North	Male	20_40	No	Yes	NA	Live	1	1
West	Male	41_60	No	Yes	No	Live	1	1
South	Male	61_140	No	Yes	NA	Live	1	1
Central	Male	41_60	No	Yes	Yes	Live	1	1
East	Female	20_40	No	No	NA	Live	1	1
South	Male	61_140	No	Yes	No	Live	1	1
East	Male	61_140	No	Yes	NA	Live	1	1
Central	Male	20_40	No	No	Yes	Live	1	1
Central	Male	41_60	Yes	Yes	No	Live	1	1
Central	Female	41_60	Yes	No	No	Live	1	1
Central	Female	41_60	Yes	No	No	Live	1	1
Central	Female	61_140	No	Yes	No	Live	1	1
Central	Male	41_60	No	Yes	Yes	Live	1	1
Central	Male	41_60	No	Yes	Yes	Live	1	1
Central	Male	61_140	No	Yes	Yes	Live	1	1
West	Male	61_140	No	Yes	Yes	Live	1	1
Central	Female	61_140	No	Yes	No	Live	1	1
Central	Female	41_60	Yes	No	No	Live	1	1
West	Male	41_60	No	Yes	No	Live	1	1
West	Male	41_60	No	Yes	Yes	Live	1	1
North	Male	61_140	No	Yes	Yes	Live	1	1
Central	Male	41_60	No	Yes	Yes	Live	1	1
Central	Male	20_40	No	No	Yes	Live	1	1
East	Female	20_40	No	No	NA	Live	1	1
Central	Male	61_140	No	Yes	NA	Live	1	1
Central	Male	61_140	No	Yes	Yes	Live	1	1
South	Male	61_140	No	Yes	NA	Live	1	1
East	Male	61_140	No	Yes	Yes	Live	1	1
Central	Male	61_140	No	Yes	No	Live	1	1
West	Male	61_140	No	Yes	Yes	Live	1	1
West	Female	61_140	No	Yes	No	Live	1	1
West	Male	41_60	No	Yes	NA	Live	1	1
Central	Male	61_140	No	Yes	No	Live	1	1
Central	Male	61_140	No	Yes	Yes	Live	1	1
East	Male	41_60	No	Yes	NA	Live	1	1
East	Male	61_140	No	Yes	Yes	Live	1	1
Central	Male	41_60	No	Yes	Yes	Live	1	1
West	Male	61_140	No	Yes	NA	Live	1	1
Central	Female	20_40	No	No	No	Live	1	1
Central	Male	61_140	No	Yes	No	Live	1	1
Central	Female	41_60	No	Yes	No	Live	1	1
Central	Female	41_60	No	No	No	Live	1	1
Central	Female	20_40	No	No	No	Live	1	1
Central	Male	20_40	No	No	No	Live	1	1
Central	Male	41_60	No	Yes	Yes	Live	1	1
Central	Female	1_19	No	No	No	Live	1	1
Central	Male	20_40	No	No	NA	Live	1	1
North	Male	61_140	No	No	NA	Live	1	1
South	Male	61_140	No	Yes	Yes	Live	1	1
West	Male	61_140	No	Yes	NA	Live	1	1
Central	Male	41_60	No	No	No	Live	1	1
West	Male	41_60	No	Yes	No	Live	1	1
Central	Male	41_60	No	Yes	Yes	Live	1	1
West	Male	41_60	No	Yes	No	Live	1	1
West	Male	20_40	Yes	No	No	Live	1	1
Central	Female	41_60	No	Yes	No	Live	1	1
Central	Male	41_60	No	No	Yes	Live	1	1
East	Male	20_40	No	No	NA	Live	1	1
South	Male	61_140	No	Yes	NA	Live	1	1
East	Male	41_60	No	Yes	NA	Live	1	1
East	Male	61_140	No	Yes	NA	Live	1	1
Central	Female	41_60	No	Yes	No	Live	1	1
West	Female	41_60	No	No	NA	Live	1	1
Central	Female	61_140	No	Yes	No	Live	1	1
Central	Female	61_140	No	Yes	No	Live	1	1
Central	Male	41_60	No	Yes	NA	Live	1	1
West	Male	61_140	No	Yes	NA	Live	1	1
Central	Male	41_60	No	Yes	No	Live	1	1
Central	Male	20_40	No	Yes	No	Live	1	1
West	Male	61_140	No	Yes	No	Live	1	1
West	Male	41_60	No	Yes	No	Live	1	1
Central	Male	20_40	No	No	No	Live	1	1
Central	Male	41_60	No	No	NA	Live	1	1
Central	Male	61_140	No	Yes	No	Live	1	1
Central	Male	20_40	No	Yes	Yes	Live	1	1
Central	Male	61_140	No	Yes	NA	Live	1	1
Central	Male	41_60	No	Yes	No	Live	1	1
Central	Female	61_140	No	Yes	No	Live	1	1
South	Male	41_60	No	Yes	NA	Live	1	1
Central	Male	41_60	No	Yes	Yes	Live	1	1
Central	Male	41_60	No	Yes	Yes	Live	1	1
Central	Male	41_60	No	Yes	NA	Live	1	1
Central	Female	61_140	No	Yes	No	Live	1	1
Central	Male	20_40	No	Yes	Yes	Live	1	1
Central	Male	41_60	No	Yes	No	Live	1	1
Central	Female	61_140	No	Yes	No	Live	1	1
Central	Male	20_40	No	No	NA	Live	1	1
Central	Male	41_60	No	No	Yes	Live	1	1
Central	Male	20_40	No	No	No	Live	1	1
Central	Male	61_140	No	Yes	No	Live	1	1
Central	Male	20_40	Yes	No	NA	Live	1	1
Central	Male	41_60	No	No	No	Live	1	1
Central	Male	41_60	No	No	No	Live	1	1
Central	Male	20_40	No	No	NA	Live	1	1
Central	Male	20_40	No	No	No	Live	1	1
Central	Male	20_40	No	No	No	Live	1	1
Central	Male	41_60	No	No	No	Live	1	1
Central	Male	41_60	No	Yes	Yes	Live	1	1
Central	Male	20_40	Yes	No	NA	Live	1	1
Central	Male	41_60	Yes	No	No	Live	1	1
Central	Male	20_40	Yes	No	No	Live	1	1
Central	Female	41_60	Yes	No	No	Live	1	1
Central	Male	41_60	Yes	No	No	Live	1	1
Central	Male	20_40	Yes	No	No	Live	1	1
Central	Male	20_40	No	No	NA	Live	1	1
Central	Male	20_40	No	No	NA	Live	1	1
Central	Male	41_60	No	Yes	Yes	Live	1	1
Central	Female	20_40	No	No	NA	Live	1	1
Central	Male	20_40	No	No	No	Live	1	1
Central	Female	20_40	No	Yes	NA	Live	1	1
Central	Female	1_19	No	No	No	Live	1	1
Central	Male	61_140	No	Yes	No	Live	1	1
Central	Female	20_40	Yes	No	No	Live	1	1
Central	Male	41_60	No	Yes	Yes	Live	1	1
Central	Female	41_60	No	No	NA	Live	1	1
Central	Male	41_60	Yes	Yes	No	Live	1	1
Central	Female	61_140	No	Yes	No	Live	1	1
Central	Male	41_60	No	Yes	No	Live	1	1
Central	Male	61_140	No	Yes	Yes	Live	1	1
Central	Male	61_140	No	Yes	No	Live	1	1
South	Male	61_140	No	Yes	No	Live	1	1
Central	Male	20_40	No	No	No	Live	1	1
North	Male	61_140	No	Yes	Yes	Live	1	1
Central	Male	61_140	No	Yes	No	Live	1	1
Central	Male	41_60	No	Yes	No	Live	1	1
Central	Male	61_140	No	Yes	NA	Live	1	1
South	Male	20_40	No	Yes	NA	Live	1	1
Central	Male	41_60	No	No	Yes	Live	1	1
Central	Male	20_40	No	No	No	Live	1	1
West	Male	41_60	No	No	NA	Live	1	1
West	Male	61_140	No	Yes	NA	Live	1	1
Central	Female	20_40	No	No	No	Live	1	1
West	Male	61_140	No	Yes	NA	Live	1	1
Central	Male	41_60	No	No	Yes	Live	1	1
Central	Male	61_140	No	Yes	NA	Live	1	1
Central	Male	41_60	No	Yes	Yes	Live	1	1
Central	Female	61_140	No	Yes	NA	Live	1	1
Central	Male	41_60	No	Yes	No	Live	1	1
Central	Male	41_60	No	Yes	No	Live	1	1
Central	Male	20_40	No	No	No	Live	1	1
Central	Male	20_40	No	No	No	Live	1	1
Central	Male	41_60	No	Yes	NA	Live	1	1
Central	Female	20_40	Yes	No	No	Live	1	1
Central	Male	41_60	No	Yes	Yes	Live	1	1
Central	Male	41_60	No	Yes	Yes	Live	1	1
Central	Female	41_60	No	Yes	No	Live	1	1
South	Female	20_40	Yes	Yes	No	Live	1	1
South	Female	41_60	Yes	Yes	No	Live	1	1
Central	Male	41_60	No	Yes	Yes	Live	1	1
South	Female	61_140	Yes	No	No	Live	1	1
Central	Male	41_60	No	Yes	No	Live	1	1
Central	Male	20_40	No	No	No	Live	1	1
Central	Male	61_140	No	Yes	Yes	Live	1	1
Central	Female	20_40	No	No	No	Live	1	1
Central	Female	41_60	No	Yes	No	Live	1	1
Central	Male	61_140	No	Yes	No	Live	1	1
Central	Female	20_40	No	No	No	Live	1	1
Central	Female	41_60	No	Yes	No	Live	1	1
East	Male	41_60	No	No	NA	Live	1	1
North	Male	41_60	No	No	NA	Live	1	1
South	Male	41_60	No	Yes	No	Live	1	1
South	Male	61_140	No	Yes	No	Live	1	1
Central	Male	41_60	No	Yes	NA	Live	1	1
West	Male	61_140	No	Yes	NA	Live	1	1
South	Male	61_140	No	Yes	No	Live	1	1
East	Female	41_60	No	Yes	No	Live	1	1
East	Female	41_60	No	Yes	No	Live	1	1
East	Male	41_60	No	No	No	Live	1	1
East	Male	20_40	No	No	NA	Live	1	1
West	Male	41_60	No	Yes	No	Live	1	1
East	Male	41_60	Yes	Yes	NA	Live	1	1
East	Female	20_40	Yes	No	No	Live	1	1
East	Male	20_40	Yes	No	No	Live	1	1
Central	Male	41_60	No	No	No	Live	1	1
East	Female	20_40	Yes	No	No	Live	1	1
South	Male	61_140	No	Yes	NA	Live	1	1
East	Male	20_40	No	Yes	No	Live	1	1
South	Male	41_60	No	No	NA	Live	1	1
Central	Male	61_140	No	Yes	No	Live	1	1
East	Female	61_140	No	Yes	No	Live	1	1
Central	Male	41_60	No	Yes	No	Live	1	1
West	Male	41_60	No	Yes	No	Live	1	1
Central	Male	41_60	No	Yes	No	Live	1	1
Central	Male	20_40	No	Yes	No	Live	1	1
Central	Female	61_140	No	Yes	No	Live	1	1
Central	Male	41_60	No	Yes	No	Live	1	1
Central	Female	20_40	No	Yes	No	Live	1	1
Central	Female	41_60	No	No	No	Live	1	1
Central	Male	61_140	No	Yes	Yes	Live	1	1
Central	Female	20_40	Yes	No	No	Live	1	1
Central	Male	20_40	No	No	No	Live	1	1
Central	Male	41_60	No	No	No	Live	1	1
Central	Male	20_40	No	Yes	No	Live	1	1
Central	Male	41_60	No	Yes	No	Live	1	1
West	Male	41_60	No	Yes	No	Live	1	1
West	Female	61_140	No	No	No	Live	1	1
West	Female	41_60	No	No	No	Live	1	1
South	Male	41_60	No	Yes	Yes	Live	1	1
South	Male	20_40	No	Yes	No	Live	1	1
South	Male	41_60	No	No	Yes	Live	1	1
South	Male	1_19	No	No	NA	Live	1	1
South	Male	20_40	No	No	NA	Live	1	1
South	Male	20_40	No	No	Yes	Live	1	1
South	Male	41_60	No	Yes	No	Live	1	1
South	Male	20_40	No	No	NA	Live	1	1
South	Male	41_60	No	Yes	NA	Live	1	1
Central	Male	41_60	No	Yes	No	Live	1	1
Central	Female	20_40	No	Yes	No	Live	1	1
East	Male	41_60	No	Yes	Yes	Live	1	1
North	Male	20_40	No	Yes	Yes	Live	1	1
Central	Female	20_40	No	Yes	No	Live	1	1
Central	Male	41_60	No	No	No	Live	1	1
West	Male	41_60	No	Yes	NA	Live	1	1
Central	Male	41_60	No	No	No	Live	1	1
North	Female	61_140	No	Yes	NA	Live	1	1
Central	Male	41_60	No	Yes	No	Live	1	1
Central	Male	61_140	No	Yes	No	Live	1	1
West	Male	61_140	No	Yes	NA	Live	1	1
West	Male	61_140	No	Yes	NA	Live	1	1
North	Female	41_60	No	Yes	No	Live	1	1
South	Male	20_40	No	Yes	No	Live	1	1
Central	Male	41_60	No	No	No	Live	1	1
North	Male	41_60	No	Yes	No	Live	1	1
South	Male	61_140	No	Yes	NA	Live	1	1
West	Female	20_40	No	No	No	Live	1	1
Central	Male	1_19	No	Yes	No	Live	1	1
Central	Male	41_60	No	Yes	Yes	Live	1	1
West	Female	61_140	No	Yes	No	Live	1	1
South	Male	61_140	No	Yes	Yes	Live	1	1
East	Male	41_60	No	Yes	Yes	Live	1	1
East	Male	41_60	No	Yes	NA	Live	1	1
South	Male	41_60	No	Yes	No	Live	1	1
South	Male	41_60	No	Yes	NA	Live	1	1
Central	Female	41_60	No	Yes	No	Live	1	1
West	Male	61_140	No	Yes	NA	Live	1	1
Central	Female	61_140	No	Yes	No	Live	1	1
North	Male	41_60	No	Yes	No	Live	1	1
North	Female	41_60	No	Yes	No	Live	1	1
South	Male	41_60	No	Yes	NA	Live	1	1
Central	Male	61_140	No	Yes	No	Live	1	1
Central	Male	20_40	No	No	No	Live	1	1
South	Male	41_60	No	Yes	No	Live	1	1
West	Female	41_60	No	Yes	NA	Live	1	1
Central	Male	61_140	No	Yes	Yes	Live	1	1
Central	Male	61_140	No	Yes	No	Live	1	1
Central	Male	41_60	No	Yes	Yes	Live	1	1
North	Male	61_140	No	Yes	No	Live	1	1
West	Female	41_60	No	No	No	Live	1	1
West	Male	41_60	No	Yes	No	Live	1	1
Central	Male	41_60	No	Yes	No	Live	1	1
Central	Male	41_60	No	Yes	NA	Live	1	1
Central	Male	20_40	No	Yes	No	Live	1	1
South	Male	61_140	No	Yes	Yes	Live	1	1
East	Male	20_40	No	Yes	NA	Live	1	1
North	Male	61_140	No	Yes	No	Live	1	1
Central	Male	61_140	No	Yes	No	Live	1	1
North	Male	41_60	No	Yes	No	Live	1	1
North	Male	61_140	No	Yes	NA	Death	1	1
Central	Male	61_140	No	Yes	Yes	Death	0	1
Central	Male	61_140	No	Yes	Yes	Death	1	1
North	Male	41_60	No	Yes	No	Death	1	1
East	Male	20_40	No	Yes	NA	Death	0	1
East	Female	61_140	No	Yes	NA	Death	1	1
West	Male	41_60	No	Yes	Yes	Death	0	1
West	Male	61_140	No	Yes	Yes	Death	0	1
West	Male	61_140	No	Yes	No	Death	0	1
West	Male	41_60	No	Yes	No	Death	0	1
West	Female	61_140	No	Yes	No	Death	1	1
Central	Male	20_40	No	No	NA	Death	0	0
North	Male	41_60	No	Yes	NA	Death	1	1
West	Male	41_60	No	Yes	No	Death	0	0
South	Male	20_40	Yes	No	NA	Death	1	1
North	Male	41_60	No	No	Yes	Death	1	1
North	Male	61_140	No	Yes	NA	Death	1	1
South	Male	41_60	No	Yes	NA	Death	0	1
Central	Male	61_140	No	Yes	NA	Death	1	1
West	Male	61_140	No	Yes	No	Death	1	1
South	Male	61_140	No	Yes	No	Death	1	1
Central	Male	41_60	No	Yes	NA	Death	0	1
North	Male	20_40	Yes	Yes	NA	Death	1	1
Central	Male	61_140	No	Yes	NA	Death	1	1
Central	Male	41_60	No	Yes	NA	Death	0	1
West	Male	41_60	No	Yes	No	Death	0	1
Central	Male	61_140	No	Yes	NA	Death	1	1
Central	Male	41_60	No	Yes	NA	Death	1	1
Central	Male	20_40	No	No	NA	Death	1	1
Central	Male	20_40	No	No	NA	Death	0	1
East	Male	41_60	No	No	NA	Death	0	1
Central	Male	20_40	No	Yes	NA	Death	1	1
Central	Male	61_140	No	Yes	NA	Death	1	1
Central	Male	41_60	No	Yes	NA	Death	0	1
South	Male	41_60	No	Yes	NA	Death	0	1
South	Male	61_140	No	Yes	No	Death	0	1
South	Male	61_140	No	Yes	NA	Death	1	1
Central	Male	41_60	No	No	NA	Death	1	1
East	Male	61_140	No	Yes	NA	Death	1	1
Central	Male	41_60	No	Yes	NA	Death	1	1
East	Male	20_40	No	No	Yes	Death	1	1
West	Male	61_140	No	Yes	Yes	Death	1	1
West	Female	61_140	No	Yes	NA	Death	0	1
South	Male	61_140	No	Yes	Yes	Death	0	1
Central	Male	61_140	No	Yes	Yes	Death	0	1
West	Male	41_60	No	Yes	Yes	Death	0	1
West	Male	61_140	No	Yes	Yes	Death	1	1
South	Male	61_140	No	Yes	Yes	Death	1	1
Central	Male	61_140	No	Yes	Yes	Death	0	1
West	Male	41_60	No	Yes	NA	Death	1	1
South	Male	41_60	No	Yes	No	Death	1	1
East	Male	41_60	No	Yes	NA	Death	1	1
West	Female	61_140	No	Yes	NA	Death	1	1
West	Male	61_140	No	Yes	NA	Death	0	1
West	Male	41_60	No	Yes	NA	Death	0	1
West	Male	41_60	No	Yes	NA	Death	1	1
West	Male	41_60	No	Yes	NA	Death	0	1
Central	Female	61_140	No	Yes	NA	Death	1	1
East	Male	41_60	No	No	NA	Death	1	1
Central	Female	61_140	No	Yes	NA	Death	1	1
Central	Female	61_140	No	Yes	NA	Death	0	1
Central	Female	61_140	No	Yes	NA	Death	1	1
Central	Male	61_140	No	Yes	NA	Death	1	1
Central	Male	41_60	No	Yes	NA	Death	1	1
Central	Male	41_60	No	Yes	NA	Death	1	1
Central	Male	20_40	No	No	Yes	Death	0	1
Central	Male	61_140	No	Yes	Yes	Death	1	1
Central	Male	61_140	No	Yes	NA	Death	1	1
Central	Male	41_60	No	Yes	NA	Death	1	1
West	Male	41_60	No	Yes	NA	Death	1	1
Central	Male	61_140	No	Yes	NA	Death	0	1
Central	Male	61_140	No	Yes	NA	Death	0	1
North	Male	61_140	No	Yes	NA	Death	1	1
North	Female	61_140	No	Yes	NA	Death	0	1
South	Male	61_140	No	Yes	No	Death	1	1
Central	Male	61_140	No	Yes	NA	Death	1	1
South	Female	41_60	No	Yes	NA	Death	1	1
Central	Male	20_40	No	Yes	NA	Death	0	0
Central	Male	41_60	No	Yes	NA	Death	0	1
South	Male	41_60	No	Yes	NA	Death	1	1
Central	Male	41_60	No	Yes	NA	Death	1	1
Central	Female	61_140	No	Yes	NA	Death	1	1
Central	Female	41_60	No	Yes	NA	Death	1	1
East	Male	61_140	No	Yes	NA	Death	1	1
South	Female	61_140	No	Yes	No	Death	1	1
Central	Male	41_60	No	Yes	NA	Death	1	1
Central	Male	61_140	No	Yes	NA	Death	1	1
East	Male	61_140	No	Yes	NA	Death	1	1
Central	Male	61_140	No	Yes	NA	Death	0	0
Central	Male	20_40	No	Yes	NA	Death	0	1
Central	Male	61_140	No	Yes	NA	Death	0	1
Central	Male	41_60	No	Yes	NA	Death	1	1
North	Female	41_60	No	Yes	NA	Death	1	1
North	Male	61_140	No	Yes	NA	Death	0	1
West	Male	41_60	No	Yes	NA	Death	1	1
Central	Male	61_140	No	Yes	NA	Death	1	1
Central	Male	61_140	No	Yes	NA	Death	1	1
Central	Female	1_19	No	Yes	NA	Death	1	1
Central	Male	61_140	No	Yes	NA	Death	1	1
Central	Male	61_140	No	Yes	NA	Death	1	1
Central	Male	61_140	No	Yes	NA	Death	1	1
East	Male	61_140	No	Yes	NA	Death	1	1
Central	Male	61_140	No	Yes	NA	Death	0	1
East	Male	41_60	No	No	Yes	Death	0	1
South	Male	41_60	No	Yes	Yes	Death	1	1
West	Male	61_140	No	Yes	No	Death	0	1
East	Male	41_60	No	Yes	NA	Death	0	1
West	Male	61_140	No	Yes	NA	Death	0	1
East	Male	61_140	No	Yes	NA	Death	1	1
West	Male	61_140	No	Yes	NA	Death	1	1
Central	Male	61_140	No	Yes	NA	Death	1	1
Central	Male	61_140	No	Yes	No	Death	0	1
Central	Male	61_140	No	Yes	NA	Death	1	1
Central	Male	20_40	No	No	No	Death	1	1
Central	Male	61_140	No	Yes	No	Death	1	1
Central	Male	61_140	No	Yes	No	Death	1	1
Central	Male	20_40	No	Yes	NA	Death	1	1
Central	Male	41_60	No	Yes	No	Death	1	1
North	Male	61_140	No	Yes	Yes	Death	0	1
Central	Female	61_140	No	Yes	No	Death	1	1
Central	Male	41_60	No	Yes	No	Death	1	1
Central	Male	41_60	No	Yes	No	Death	1	1
Central	Female	20_40	Yes	No	No	Death	1	1
Central	Male	61_140	No	Yes	NA	Death	1	1
Central	Male	20_40	No	Yes	NA	Death	0	1
West	Male	41_60	No	No	No	Death	0	1
Central	Male	20_40	No	Yes	NA	Death	1	1
Central	Male	41_60	No	Yes	NA	Death	0	1
Central	Male	61_140	No	Yes	NA	Death	0	1
East	Male	61_140	No	Yes	NA	Death	1	1
South	Male	20_40	No	No	No	Death	1	1
East	Male	41_60	Yes	Yes	NA	Death	0	1
East	Male	41_60	No	Yes	NA	Death	1	1
East	Male	41_60	No	Yes	NA	Death	1	1
East	Male	61_140	No	Yes	NA	Death	1	1
West	Male	61_140	No	Yes	No	Death	0	1
East	Male	61_140	No	No	No	Death	1	1
West	Male	61_140	No	Yes	NA	Death	1	1
West	Male	61_140	No	Yes	NA	Death	0	1
West	Male	61_140	No	Yes	NA	Death	1	1
Central	Male	61_140	No	Yes	NA	Death	1	1
West	Male	61_140	No	Yes	No	Death	1	1
South	Male	20_40	No	Yes	NA	Death	1	1
Central	Male	61_140	No	Yes	NA	Death	0	1
West	Male	61_140	No	Yes	NA	Death	0	1
East	Male	20_40	No	No	No	Live	1	1
East	Male	41_60	Yes	Yes	No	Live	1	1
East	Female	41_60	Yes	No	No	Live	1	1
East	Female	41_60	Yes	No	No	Live	1	1
East	Female	61_140	No	Yes	No	Live	1	1
East	Male	41_60	No	Yes	No	Live	1	1
East	Male	41_60	No	Yes	No	Live	1	1
East	Male	61_140	No	Yes	No	Live	1	1
East	Female	61_140	No	Yes	No	Live	1	1
East	Female	41_60	Yes	No	No	Live	1	1
East	Male	41_60	No	Yes	NA	Live	1	1
East	Male	20_40	No	No	No	Live	1	1
East	Male	61_140	No	Yes	NA	Live	1	1
East	Male	61_140	No	Yes	No	Live	1	1
East	Male	61_140	No	Yes	No	Live	1	1
East	Male	61_140	No	Yes	No	Live	1	1
East	Male	61_140	No	Yes	Yes	Live	1	1
East	Male	41_60	No	Yes	Yes	Live	1	1
East	Female	20_40	No	No	No	Live	1	1
East	Male	61_140	No	Yes	No	Live	1	1
East	Female	41_60	No	Yes	No	Live	1	1
East	Female	41_60	No	No	No	Live	1	1
East	Female	20_40	No	No	No	Live	1	1
East	Male	20_40	No	No	No	Live	1	1
East	Male	41_60	No	Yes	Yes	Live	1	1
East	Female	1_19	No	No	No	Live	1	1
East	Male	20_40	No	No	Yes	Live	1	1
East	Male	41_60	No	No	No	Live	1	1
East	Male	41_60	No	Yes	NA	Live	1	1
East	Female	41_60	No	Yes	No	Live	1	1
East	Male	41_60	No	No	NA	Live	1	1
East	Female	41_60	No	Yes	No	Live	1	1
East	Female	61_140	No	Yes	No	Live	1	1
East	Female	61_140	No	Yes	No	Live	1	1
East	Male	41_60	No	Yes	No	Live	1	1
East	Male	41_60	No	Yes	No	Live	1	1
East	Male	20_40	No	Yes	No	Live	1	1
East	Male	20_40	No	No	No	Live	1	1
North	Male	1_19	No	NA	NA	Death	0	1
Central	Female	20_40	No	NA	NA	Live	1	1
West	Female	41_60	No	NA	NA	Death	0	1
West	Female	41_60	Yes	NA	NA	Live	1	1
West	Female	41_60	Yes	NA	NA	Live	1	1
Central	Male	41_60	No	NA	Yes	Live	1	1
Central	Male	41_60	No	NA	NA	Live	1	1
West	Female	1_19	Yes	NA	No	Live	1	1
West	Male	1_19	No	NA	No	Live	1	1
West	Male	1_19	No	NA	No	Live	1	1
West	Female	1_19	No	NA	No	Live	1	1
West	Male	20_40	No	NA	NA	Live	1	1
Central	Female	20_40	No	NA	NA	Live	1	1
West	Male	20_40	No	NA	Yes	Live	1	1
West	Male	20_40	Yes	NA	No	Live	1	1
West	Male	20_40	No	NA	Yes	Live	1	1
Central	Male	20_40	Yes	NA	No	Live	1	1
West	Male	20_40	No	NA	Yes	Live	1	1
West	Female	20_40	No	NA	NA	Live	1	1
Central	Female	20_40	Yes	NA	NA	Live	1	1
Central	Female	20_40	Yes	NA	NA	Live	1	1
Central	Female	20_40	Yes	NA	NA	Live	1	1
Central	Female	20_40	Yes	NA	NA	Live	1	1
North	Male	41_60	No	NA	NA	Death	1	1
West	Male	41_60	No	NA	Yes	Live	1	1
Central	Male	41_60	Yes	NA	No	Live	1	1
Central	Female	41_60	Yes	NA	NA	Live	1	1
Central	Female	41_60	Yes	NA	NA	Live	1	1
Central	Female	41_60	No	NA	NA	Live	1	1
West	Male	41_60	No	NA	Yes	Live	1	1
Central	Female	41_60	Yes	NA	NA	Live	1	1
Central	Male	41_60	No	NA	Yes	Live	1	1
South	Male	41_60	No	NA	NA	Live	1	1
West	Male	41_60	No	NA	Yes	Live	1	1
Central	Male	41_60	No	NA	Yes	Live	1	1
Central	Female	41_60	Yes	NA	NA	Live	1	1
West	Male	41_60	No	NA	Yes	Live	1	1
West	Male	41_60	Yes	NA	No	Live	1	1
West	Male	41_60	No	NA	Yes	Live	1	1
West	Male	41_60	Yes	NA	No	Live	1	1
Central	Male	61_140	No	NA	Yes	Live	1	1
West	Male	61_140	No	NA	Yes	Live	1	1
West	Male	61_140	No	NA	Yes	Live	1	1
Central	Male	61_140	No	NA	Yes	Live	1	1
Central	Male	61_140	No	NA	Yes	Live	1	1
West	Male	61_140	No	NA	NA	Death	0	1
West	Male	1_19	No	No	No	Live	1	1
West	Male	41_60	No	NA	Yes	Live	1	1
Central	Male	61_140	No	No	Yes	Live	1	1
West	Male	20_40	No	No	Yes	Live	1	1
West	Male	20_40	No	NA	Yes	Live	1	1
West	Male	41_60	No	No	Yes	Live	1	1
West	Male	41_60	No	NA	Yes	Live	1	1
West	Female	61_140	No	NA	NA	Death	0	1
West	Male	61_140	No	Yes	NA	Death	1	1
Central	Female	20_40	No	No	NA	Live	1	1
West	Male	41_60	No	No	Yes	Live	1	1
West	Male	41_60	No	No	Yes	Live	1	1
West	Male	41_60	Yes	No	No	Live	1	1
West	Female	41_60	No	Yes	NA	Death	1	1
West	Male	61_140	No	Yes	NA	Death	0	1
North	Male	20_40	No	NA	No	Live	1	1
East	Male	41_60	No	NA	Yes	Live	1	1
West	Male	41_60	No	Yes	NA	Death	1	1
West	Male	61_140	No	Yes	NA	Death	0	1
Central	Female	20_40	No	No	NA	Live	1	1
West	Male	61_140	No	No	Yes	Live	1	1
North	Male	20_40	No	No	No	Live	1	1
East	Male	41_60	No	No	NA	Live	1	1
Central	Male	41_60	No	No	Yes	Live	1	1
Central	Male	61_140	No	No	Yes	Live	1	1
North	Female	20_40	Yes	No	No	Live	1	1
East	Male	41_60	No	Yes	NA	Death	0	0
North	Female	20_40	Yes	No	No	Live	1	1
Central	Female	20_40	No	No	NA	Live	1	1
West	Male	20_40	No	No	Yes	Live	1	1
West	Female	41_60	Yes	No	NA	Live	1	1
Central	Female	61_140	No	No	NA	Live	1	1
West	Female	41_60	Yes	No	No	Live	1	1
West	Male	61_140	No	Yes	NA	Death	0	1
North	Male	20_40	No	No	No	Live	1	1
North	Male	20_40	No	No	No	Live	1	1
Central	Male	41_60	No	Yes	Yes	Live	1	1
West	Female	1_19	No	NA	No	Live	1	1
West	Male	20_40	No	NA	No	Live	1	1
West	Female	20_40	Yes	NA	No	Live	1	1
West	Male	20_40	No	NA	No	Live	1	1
North	Male	61_140	No	Yes	NA	Death	0	1
West	Male	61_140	No	Yes	NA	Death	0	0
Central	Male	61_140	No	No	NA	Death	1	1
South	Male	61_140	No	Yes	NA	Death	1	1
West	Male	41_60	No	Yes	NA	Death	0	1
East	Male	41_60	No	Yes	Yes	Death	0	1
West	Male	61_140	No	Yes	No	Live	1	1
Central	Male	41_60	No	Yes	NA	Death	1	1
North	Female	41_60	No	Yes	NA	Death	1	1
West	Male	61_140	No	Yes	Yes	Death	0	1
South	Male	41_60	No	No	Yes	Live	1	1
West	Male	41_60	No	Yes	Yes	Death	0	1
Central	Male	61_140	No	Yes	Yes	Live	1	1
West	Female	20_40	No	No	No	Live	1	1
Central	Male	41_60	No	Yes	NA	Death	0	1
West	Male	61_140	No	Yes	Yes	Death	1	1
West	Male	20_40	Yes	No	No	Live	1	1
West	Male	41_60	No	No	No	Live	1	1
Central	Male	61_140	No	Yes	NA	Death	1	1
West	Female	61_140	No	Yes	No	Death	1	1
West	Male	61_140	No	Yes	No	Death	1	1
West	Male	41_60	No	Yes	No	Death	1	1
Central	Female	61_140	No	Yes	NA	Death	0	1
Central	Female	61_140	No	Yes	NA	Live	1	1
West	Male	61_140	No	Yes	No	Death	1	1
Central	Male	1_19	No	Yes	No	Live	1	1
West	Male	20_40	Yes	Yes	No	Live	1	1
Central	Female	41_60	Yes	Yes	NA	Live	1	1
West	Female	61_140	No	Yes	No	Death	0	1
Central	Female	20_40	No	No	NA	Live	1	1
Central	Male	20_40	No	No	Yes	Live	1	1
Central	Male	41_60	No	No	Yes	Live	1	1
Central	Male	41_60	Yes	Yes	No	Live	1	1
West	Male	61_140	No	Yes	No	Death	1	1
West	Male	61_140	No	Yes	No	Live	1	1
West	Male	20_40	No	Yes	No	Live	1	1
North	Male	20_40	No	No	No	Death	1	1
Central	Female	61_140	No	Yes	NA	Death	0	1
Central	Male	20_40	No	Yes	Yes	Live	1	1
Central	Female	41_60	No	Yes	NA	Live	1	1
Central	Female	61_140	No	Yes	NA	Death	1	1
Central	Male	61_140	No	Yes	NA	Death	1	1
West	Female	61_140	No	Yes	No	Death	1	1
West	Male	41_60	No	Yes	No	Death	1	1
North	Female	41_60	No	Yes	NA	Live	1	1
Central	Female	20_40	Yes	Yes	NA	Live	1	1
Central	Male	41_60	No	Yes	Yes	Live	1	1
Central	Male	41_60	No	Yes	Yes	Live	1	1
Central	Male	41_60	No	Yes	NA	Death	0	1
North	Male	61_140	No	No	No	Live	1	1
East	Male	61_140	No	Yes	NA	Death	0	1
Central	Male	41_60	No	Yes	NA	Death	0	1
Central	Male	61_140	No	Yes	Yes	Live	1	1
Central	Female	20_40	No	Yes	NA	Death	1	1
Central	Male	61_140	No	Yes	Yes	Live	1	1
West	Male	61_140	No	Yes	No	Death	1	1
Central	Male	61_140	No	Yes	NA	Death	0	1
Central	Female	41_60	No	Yes	NA	Death	1	1
Central	Male	20_40	No	No	Yes	Live	1	1
Central	Male	20_40	No	Yes	Yes	Live	1	1
East	Male	41_60	No	Yes	NA	Death	0	1
East	Male	41_60	No	No	Yes	Live	1	1
West	Female	61_140	No	Yes	No	Death	0	1
South	Female	41_60	No	Yes	NA	Death	1	1
East	Male	41_60	No	Yes	NA	Live	1	1
West	Male	61_140	No	Yes	No	Live	1	1
East	Male	61_140	No	Yes	Yes	Live	1	1
Central	Male	61_140	No	Yes	Yes	Death	1	1
East	Female	20_40	Yes	No	NA	Live	1	1
Central	Male	41_60	Yes	Yes	No	Death	0	1
West	Male	61_140	Yes	Yes	No	Death	0	1
Central	Male	61_140	No	Yes	Yes	Death	0	0
East	Male	61_140	No	Yes	NA	Death	1	1
Central	Female	61_140	No	Yes	NA	Live	1	1
East	Male	41_60	No	Yes	Yes	Live	1	1
East	Male	41_60	No	Yes	Yes	Live	1	1
Central	Male	41_60	No	Yes	Yes	Death	1	1
Central	Male	41_60	No	Yes	Yes	Death	1	1
North	Male	61_140	No	Yes	No	Death	1	1
Central	Male	20_40	No	Yes	Yes	Death	1	1
Central	Male	20_40	No	Yes	Yes	Live	1	1
Central	Male	20_40	No	Yes	Yes	Death	1	1
Central	Male	41_60	No	No	Yes	Live	1	1
East	Female	61_140	No	Yes	NA	Death	0	1
East	Female	61_140	No	Yes	NA	Death	1	1
Central	Male	61_140	No	Yes	Yes	Death	0	1
East	Male	41_60	No	Yes	NA	Death	0	1
Central	Male	20_40	No	Yes	Yes	Live	1	1
Central	Male	41_60	Yes	Yes	No	Live	1	1
Central	Female	41_60	Yes	Yes	NA	Death	0	1
Central	Male	61_140	No	No	Yes	Death	0	1
Central	Male	20_40	No	Yes	Yes	Live	1	1
South	Male	20_40	No	No	Yes	Live	1	1
East	Male	20_40	Yes	No	No	Live	1	1
South	Male	41_60	No	Yes	Yes	Death	0	1
North	Female	41_60	No	Yes	NA	Live	1	1
East	Male	61_140	No	No	NA	Death	0	1
Central	Male	20_40	No	No	Yes	Live	1	1
Central	Female	20_40	No	No	NA	Live	1	1
West	Female	41_60	No	No	No	Live	1	1
Central	Female	41_60	No	Yes	NA	Live	1	1
Central	Male	61_140	No	No	Yes	Death	1	1
Central	Male	20_40	No	Yes	NA	Live	1	1
Central	Female	41_60	No	Yes	NA	Live	1	1
Central	Male	41_60	No	Yes	Yes	Death	1	1
West	Female	41_60	No	Yes	No	Death	1	1
West	Female	61_140	No	Yes	No	Death	0	1
Central	Male	61_140	No	Yes	Yes	Death	1	1
North	Female	20_40	No	Yes	NA	Death	1	1
South	Male	41_60	No	No	NA	Live	1	1
East	Male	61_140	No	Yes	Yes	Live	1	1
Central	Male	61_140	No	Yes	NA	Death	0	1
Central	Male	41_60	No	Yes	Yes	Death	1	1
Central	Male	41_60	No	Yes	Yes	Death	1	1
Central	Male	61_140	No	Yes	NA	Death	1	1
Central	Female	61_140	No	Yes	NA	Death	0	1
East	Male	41_60	No	No	Yes	Live	1	1
East	Male	41_60	Yes	Yes	NA	Live	1	1
Central	Female	61_140	No	Yes	NA	Death	1	1
Central	Male	20_40	No	No	Yes	Live	1	1
Central	Female	20_40	No	No	NA	Live	1	1
Central	Male	41_60	No	No	NA	Live	1	1
Central	Male	61_140	No	Yes	Yes	Death	1	1
Central	Male	41_60	No	Yes	Yes	Live	1	1
Central	Male	41_60	No	Yes	NA	Death	1	1
Central	Male	20_40	Yes	Yes	No	Live	1	1
Central	Male	20_40	No	No	Yes	Death	0	1
East	Male	20_40	No	No	Yes	Live	1	1
East	Male	41_60	No	Yes	Yes	Live	1	1
Central	Male	61_140	No	Yes	NA	Death	1	1
Central	Male	41_60	No	Yes	Yes	Death	1	1
Central	Male	61_140	No	Yes	Yes	Death	1	1
Central	Female	61_140	No	Yes	NA	Live	1	1
Central	Male	61_140	No	Yes	NA	Death	1	1
Central	Female	61_140	No	Yes	NA	Live	1	1
Central	Male	41_60	No	Yes	Yes	Live	1	1
Central	Female	41_60	No	Yes	NA	Live	1	1
Central	Male	20_40	No	Yes	NA	Death	1	1
Central	Male	41_60	No	No	Yes	Live	1	1
Central	Male	61_140	No	Yes	NA	Live	1	1
Central	Male	41_60	No	Yes	Yes	Death	1	1
Central	Female	41_60	Yes	No	NA	Live	1	1
Central	Male	41_60	No	Yes	NA	Live	1	1
Central	Female	61_140	No	Yes	NA	Death	1	1
Central	Female	61_140	No	Yes	NA	Death	0	1
East	Male	41_60	No	Yes	Yes	Live	1	1
Central	Male	20_40	No	Yes	Yes	Live	1	1
Central	Female	41_60	Yes	No	NA	Live	1	1
Central	Female	61_140	Yes	Yes	No	Live	1	1
Central	Male	20_40	No	Yes	NA	Live	1	1
Central	Female	41_60	No	No	No	Live	1	1
Central	Female	41_60	No	Yes	No	Live	1	1
Central	Male	61_140	No	Yes	Yes	Death	1	1
East	Male	41_60	Yes	No	No	Live	1	1
Central	Male	20_40	Yes	No	No	Live	1	1
East	Male	41_60	No	Yes	No	Live	1	1
Central	Male	41_60	No	Yes	NA	Live	1	1
East	Male	41_60	No	Yes	NA	Death	1	1
North	Male	61_140	No	Yes	NA	Death	1	1
West	Male	41_60	No	No	No	Death	0	1
South	Male	41_60	No	No	Yes	Live	1	1
East	Male	41_60	No	No	Yes	Death	1	1
West	Male	20_40	No	No	No	Live	1	1
Central	Female	61_140	No	Yes	No	Live	1	1
Central	Female	61_140	No	Yes	NA	Death	1	1
Central	Female	20_40	No	Yes	NA	Death	1	1
West	Male	61_140	No	Yes	No	Death	1	1
South	Male	61_140	No	Yes	NA	Death	1	1
West	Male	61_140	No	Yes	No	Death	1	1
East	Male	20_40	No	Yes	Yes	Death	1	1
Central	Male	20_40	No	No	NA	Live	1	1
Central	Female	61_140	No	Yes	NA	Death	1	1
West	Male	61_140	No	Yes	No	Live	1	1
Central	Male	61_140	No	Yes	Yes	Death	0	1
East	Male	61_140	No	Yes	No	Death	1	1
East	Female	61_140	No	Yes	No	Death	1	1
East	Female	61_140	No	Yes	No	Death	1	1
West	Male	41_60	No	Yes	No	Death	0	1
East	Male	61_140	No	Yes	No	Live	1	1
East	Male	20_40	No	Yes	No	Death	1	1
East	Female	41_60	No	Yes	No	Death	1	1
West	Male	61_140	No	Yes	No	Death	0	1
East	Male	61_140	No	Yes	No	Death	1	1
Central	Male	41_60	No	Yes	Yes	Death	1	1
East	Female	20_40	Yes	No	No	Live	1	1
East	Male	41_60	No	Yes	No	Death	0	1
East	Male	41_60	No	Yes	No	Death	0	0
West	Female	61_140	No	No	No	Death	1	1
East	Female	20_40	No	Yes	No	Death	0	1
East	Male	20_40	Yes	No	No	Live	1	1
East	Male	41_60	Yes	Yes	No	Live	1	1
East	Male	41_60	No	Yes	No	Live	1	1
East	Female	41_60	No	Yes	No	Live	1	1
East	Male	61_140	No	Yes	No	Live	1	1
East	Male	61_140	No	Yes	No	Death	1	1
West	Male	41_60	No	Yes	No	Death	1	1
East	Male	61_140	No	Yes	No	Death	0	1
West	Male	61_140	No	Yes	No	Death	1	1
West	Male	61_140	No	Yes	No	Death	1	1
East	Male	41_60	No	Yes	No	Death	1	1
East	Male	61_140	No	Yes	No	Death	1	1
East	Male	41_60	No	Yes	No	Death	0	1
East	Female	41_60	No	Yes	No	Death	1	1
East	Female	41_60	No	Yes	No	Live	1	1
Central	Male	61_140	No	Yes	NA	Death	0	1
East	Female	61_140	No	Yes	No	Death	1	1
East	Male	61_140	No	Yes	No	Live	1	1
Central	Female	41_60	No	Yes	No	Death	0	1
Central	Female	41_60	No	Yes	No	Death	0	1
Central	Female	61_140	No	Yes	No	Live	1	1
Central	Male	20_40	No	Yes	Yes	Live	1	1
Central	Male	20_40	No	No	No	Death	0	0
Central	Male	61_140	No	Yes	NA	Death	1	1
Central	Male	61_140	No	Yes	No	Death	0	0
Central	Male	61_140	No	Yes	NA	Death	1	1
Central	Male	20_40	No	No	Yes	Live	1	1
Central	Male	20_40	No	Yes	No	Death	1	1
Central	Female	61_140	No	Yes	No	Death	0	1
Central	Female	41_60	No	Yes	No	Live	1	1
West	Female	41_60	No	Yes	No	Live	1	1
Central	Female	61_140	No	Yes	No	Death	1	1
Central	Male	41_60	No	Yes	Yes	Live	1	1
Central	Female	61_140	No	Yes	No	Death	1	1
Central	Female	61_140	No	Yes	No	Death	1	1
South	Male	61_140	No	Yes	Yes	Death	0	1
Central	Male	61_140	No	Yes	NA	Live	1	1
Central	Male	41_60	No	Yes	No	Death	1	1
Central	Female	41_60	No	Yes	No	Death	1	1
Central	Female	41_60	No	Yes	No	Live	1	1
South	Male	41_60	Yes	Yes	No	Live	1	1
South	Male	61_140	Yes	Yes	No	Live	1	1
Central	Male	61_140	No	Yes	No	Death	1	1
Central	Male	61_140	No	Yes	No	Death	1	1
Central	Male	61_140	No	Yes	NA	Death	0	1
Central	Male	20_40	No	Yes	No	Death	0	1
Central	Male	61_140	No	Yes	No	Death	0	1
Central	Male	61_140	No	Yes	No	Death	1	1
Central	Male	61_140	No	Yes	NA	Death	1	1
Central	Female	61_140	No	Yes	No	Death	1	1
Central	Male	61_140	No	Yes	No	Death	1	1
Central	Female	61_140	No	Yes	No	Death	1	1
Central	Female	61_140	No	Yes	No	Death	1	1
Central	Female	61_140	No	Yes	No	Death	0	1
Central	Male	1_19	No	No	No	Live	1	1
Central	Female	20_40	Yes	No	No	Live	1	1
Central	Female	41_60	No	No	No	Live	1	1
Central	Female	41_60	Yes	No	No	Live	1	1
Central	Male	41_60	No	Yes	No	Death	1	1
Central	Female	41_60	No	Yes	No	Death	0	1
Central	Male	61_140	No	No	Yes	Live	1	1
Central	Female	61_140	No	Yes	No	Death	1	1
Central	Male	61_140	No	Yes	No	Death	1	1
Central	Male	61_140	No	Yes	No	Death	1	1
Central	Male	61_140	No	Yes	NA	Death	0	1
Central	Female	61_140	No	No	No	Live	1	1
Central	Male	20_40	No	No	Yes	Live	1	1
Central	Female	20_40	No	Yes	No	Live	1	1
Central	Male	20_40	No	No	Yes	Live	1	1
Central	Male	41_60	No	Yes	NA	Live	1	1
Central	Male	61_140	No	Yes	Yes	Live	1	1
Central	Female	20_40	No	No	No	Live	1	1
Central	Female	20_40	No	No	No	Live	1	1
Central	Male	41_60	No	Yes	No	Death	1	1
Central	Male	61_140	No	Yes	No	Death	1	1
Central	Male	61_140	No	Yes	No	Death	1	1
Central	Female	61_140	No	Yes	No	Death	0	1
Central	Male	41_60	No	No	No	Death	1	1
Central	Male	20_40	No	No	NA	Live	1	1
Central	Female	41_60	No	No	No	Live	1	1
Central	Male	41_60	No	Yes	NA	Death	1	1
Central	Female	41_60	No	Yes	No	Death	0	1
Central	Male	61_140	No	Yes	No	Death	0	1
Central	Male	61_140	No	Yes	No	Death	1	1
Central	Male	61_140	No	No	Yes	Live	1	1
Central	Male	20_40	No	No	NA	Live	1	1
Central	Male	41_60	No	Yes	No	Death	1	1
Central	Male	61_140	No	Yes	No	Live	1	1
Central	Male	61_140	No	Yes	No	Death	0	0
Central	Female	20_40	No	Yes	No	Death	0	1
Central	Female	41_60	No	Yes	No	Live	1	1
Central	Female	61_140	No	No	No	Live	1	1
Central	Female	41_60	No	No	No	Live	1	1
Central	Male	61_140	No	Yes	No	Death	1	1
Central	Male	61_140	No	Yes	No	Death	1	1
Central	Female	61_140	No	Yes	No	Death	1	1
Central	Male	61_140	No	Yes	No	Death	1	1
Central	Male	20_40	No	No	No	Live	1	1
Central	Male	20_40	Yes	Yes	No	Live	1	1
Central	Male	41_60	No	Yes	No	Death	0	0
Central	Male	41_60	No	Yes	No	Live	1	1
Central	Female	41_60	No	Yes	No	Live	1	1
Central	Male	41_60	No	Yes	No	Live	1	1
Central	Male	41_60	No	Yes	No	Death	1	1
Central	Female	61_140	No	Yes	No	Live	1	1
East	Male	61_140	No	Yes	No	Live	1	1
Central	Male	61_140	No	Yes	No	Death	1	1
Central	Male	61_140	No	Yes	No	Live	1	1
Central	Male	1_19	No	Yes	No	Death	1	1
Central	Female	20_40	No	Yes	No	Live	1	1
West	Male	61_140	No	Yes	No	Live	1	1
Central	Male	61_140	No	Yes	No	Death	1	1
Central	Female	61_140	No	Yes	No	Death	1	1
Central	Female	20_40	Yes	Yes	No	Live	1	1
Central	Male	20_40	No	No	No	Live	1	1
Central	Male	41_60	No	Yes	No	Live	1	1
Central	Female	20_40	Yes	No	No	Live	1	1
Central	Male	20_40	Yes	No	No	Live	1	1
Central	Male	41_60	No	Yes	No	Death	0	1
Central	Male	41_60	No	No	No	Live	1	1
Central	Male	41_60	No	Yes	No	Live	1	1
Central	Male	41_60	No	Yes	No	Live	1	1
Central	Female	41_60	No	Yes	No	Live	1	1
South	Female	20_40	No	No	NA	Live	1	1
Central	Male	61_140	No	Yes	No	Live	1	1
Central	Female	20_40	Yes	No	No	Live	1	1
Central	Male	20_40	No	Yes	No	Live	1	1
Central	Male	41_60	No	Yes	No	Live	1	1
Central	Female	20_40	Yes	No	No	Live	1	1
Central	Female	20_40	Yes	No	No	Live	1	1
Central	Male	20_40	No	Yes	No	Live	1	1
Central	Male	20_40	No	No	NA	Live	1	1
Central	Male	20_40	No	No	No	Live	1	1
Central	Male	41_60	No	Yes	No	Live	1	1
South	Female	41_60	No	Yes	NA	Live	1	1
Central	Male	41_60	No	No	No	Live	1	1
Central	Female	41_60	Yes	Yes	No	Live	1	1
South	Female	41_60	No	Yes	No	Live	1	1
South	Male	61_140	No	Yes	NA	Live	1	1
Central	Male	61_140	No	Yes	No	Live	1	1
Central	Male	61_140	Yes	Yes	No	Live	1	1
Central	Female	20_40	No	Yes	No	Live	1	1
South	Male	41_60	No	No	No	Live	1	1
Central	Female	41_60	Yes	Yes	No	Live	1	1
Central	Female	41_60	Yes	Yes	No	Death	1	1
Central	Female	41_60	No	Yes	No	Live	1	1
Central	Male	41_60	Yes	Yes	No	Death	0	1
Central	Male	20_40	Yes	No	No	Live	1	1
Central	Male	20_40	Yes	No	No	Live	1	1
Central	Female	20_40	Yes	No	No	Live	1	1
Central	Female	20_40	Yes	No	No	Live	1	1
Central	Male	20_40	Yes	No	NA	Live	1	1
Central	Male	41_60	Yes	No	NA	Live	1	1
Central	Female	41_60	Yes	Yes	No	Live	1	1
Central	Male	61_140	Yes	Yes	No	Live	1	1
Central	Female	61_140	Yes	Yes	No	Live	1	1
Central	Female	61_140	No	Yes	No	Death	1	1
Central	Male	20_40	No	Yes	No	Death	0	1
Central	Male	41_60	No	Yes	NA	Live	1	1
Central	Male	41_60	No	Yes	No	Death	0	1
Central	Female	61_140	No	Yes	No	Death	1	1
Central	Male	61_140	No	Yes	No	Death	0	1
Central	Female	20_40	Yes	No	No	Live	1	1
Central	Male	61_140	No	Yes	NA	Live	1	1
Central	Female	20_40	No	No	No	Live	1	1
West	Male	20_40	Yes	No	No	Live	1	1
Central	Male	41_60	No	Yes	No	Death	1	1
Central	Female	61_140	No	Yes	No	Death	1	1
West	Male	61_140	No	Yes	No	Death	1	1
Central	Male	61_140	No	Yes	NA	Death	1	1
Central	Male	20_40	Yes	Yes	No	Live	1	1
Central	Male	20_40	No	Yes	No	Live	1	1
Central	Female	20_40	Yes	No	No	Live	1	1
Central	Male	20_40	Yes	No	No	Live	1	1
Central	Female	20_40	Yes	No	No	Live	1	1
Central	Male	20_40	No	No	No	Live	1	1
Central	Male	41_60	No	Yes	No	Live	1	1
South	Male	41_60	No	Yes	NA	Death	1	1
Central	Male	1_19	No	No	No	Live	1	1
Central	Female	20_40	Yes	No	No	Live	1	1
Central	Male	41_60	Yes	Yes	No	Live	1	1
Central	Male	41_60	No	No	No	Live	1	1
West	Female	20_40	Yes	No	No	Live	1	1
Central	Female	61_140	No	Yes	No	Death	1	1
Central	Female	61_140	No	Yes	No	Death	1	1
Central	Female	41_60	No	Yes	No	Death	1	1
West	Female	61_140	No	No	No	Live	1	1
West	Male	61_140	No	Yes	No	Death	1	1
West	Male	20_40	No	No	No	Live	1	1
West	Male	20_40	Yes	No	No	Live	1	1
Central	Male	20_40	Yes	No	No	Live	1	1
Central	Male	41_60	No	Yes	No	Live	1	1
Central	Male	41_60	No	Yes	No	Live	1	1
Central	Male	41_60	No	Yes	No	Live	1	1
Central	Female	20_40	No	No	No	Live	1	1
Central	Male	41_60	No	Yes	No	Death	1	1
East	Male	61_140	No	Yes	No	Death	0	1
Central	Female	20_40	No	No	No	Live	1	1
Central	Female	61_140	No	No	No	Live	1	1
East	Male	61_140	No	No	No	Death	1	1
Central	Female	20_40	Yes	No	No	Live	1	1
Central	Female	20_40	No	No	No	Live	1	1
Central	Male	20_40	No	No	No	Live	1	1
Central	Female	41_60	Yes	No	No	Live	1	1
Central	Female	41_60	No	Yes	No	Live	1	1
South	Male	20_40	No	No	No	Death	0	1
Central	Male	61_140	No	Yes	No	Death	0	1
Central	Male	61_140	No	Yes	No	Death	1	1
Central	Male	61_140	No	Yes	No	Live	1	1
South	Male	41_60	No	Yes	No	Death	0	1
Central	Male	20_40	No	No	No	Live	1	1
Central	Male	20_40	No	Yes	No	Death	1	1
South	Male	41_60	No	Yes	No	Live	1	1
Central	Female	20_40	Yes	No	No	Live	1	1
South	Male	41_60	No	Yes	No	Death	1	1
Central	Female	61_140	No	Yes	No	Death	0	0
Central	Male	41_60	No	NA	No	Live	1	1
Central	Male	61_140	No	Yes	No	Live	1	1
West	Male	61_140	No	Yes	No	Death	1	1
Central	Male	61_140	No	Yes	No	Death	1	1
Central	Male	20_40	No	Yes	No	Death	1	1
Central	Male	20_40	No	Yes	No	Death	1	1
Central	Male	20_40	No	No	No	Live	1	1
Central	Male	20_40	No	No	No	Death	1	1
Central	Male	41_60	No	Yes	No	Death	1	1
West	Male	61_140	No	Yes	No	Death	0	1
Central	Female	20_40	No	Yes	No	Death	1	1
Central	Male	61_140	No	Yes	No	Death	0	1
Central	Male	41_60	No	No	No	Live	1	1
Central	Female	61_140	No	Yes	No	Live	1	1
Central	Male	61_140	No	Yes	No	Live	1	1
Central	Male	20_40	No	No	No	Death	1	1
Central	Female	41_60	No	Yes	No	Live	1	1
Central	Male	41_60	No	Yes	No	Death	1	1
Central	Male	20_40	Yes	No	No	Live	1	1
West	Male	41_60	Yes	No	No	Live	1	1
Central	Male	61_140	No	Yes	No	Live	1	1
Central	Male	61_140	No	Yes	No	Death	1	1
Central	Male	41_60	No	Yes	No	Death	1	1
East	Male	61_140	No	Yes	No	Live	1	1
Central	Female	41_60	No	Yes	No	Death	1	1
Central	Female	20_40	No	Yes	No	Death	0	1
Central	Male	41_60	Yes	No	No	Live	1	1
Central	Male	41_60	No	No	No	Live	1	1
Central	Male	61_140	No	Yes	No	Death	0	1
West	Male	41_60	No	No	No	Live	1	1
Central	Male	61_140	No	Yes	No	Live	1	1
Central	Male	41_60	No	No	No	Live	1	1
North	Male	41_60	No	Yes	No	Death	0	1
Central	Male	61_140	No	Yes	No	Live	1	1
Central	Female	61_140	No	Yes	No	Death	1	1
North	Male	61_140	No	Yes	No	Death	0	1
Central	Male	41_60	No	No	No	Live	1	1
Central	Male	61_140	No	Yes	No	Death	1	1
Central	Female	61_140	No	Yes	No	Death	1	1
Central	Female	20_40	Yes	No	No	Live	1	1
Central	Male	20_40	Yes	No	No	Live	1	1
Central	Female	20_40	Yes	No	No	Live	1	1
Central	Female	20_40	Yes	No	No	Live	1	1
South	Male	41_60	Yes	No	NA	Live	1	1
Central	Male	61_140	Yes	Yes	No	Live	1	1
Central	Male	61_140	No	Yes	No	Death	0	1
Central	Male	61_140	No	Yes	No	Live	1	1
Central	Male	41_60	No	NA	No	Live	1	1
West	Male	61_140	No	Yes	No	Live	1	1
South	Male	41_60	No	Yes	No	Death	1	1
Central	Male	20_40	No	Yes	No	Live	1	1
Central	Male	61_140	No	Yes	No	Live	1	1
Central	Female	41_60	Yes	No	No	Death	0	1
South	Male	61_140	No	Yes	No	Death	1	1
West	Male	61_140	No	Yes	No	Death	1	1
North	Male	61_140	No	Yes	No	Death	0	1
Central	Female	20_40	No	No	No	Live	1	1
Central	Female	20_40	No	No	No	Live	1	1
Central	Male	41_60	No	Yes	No	Live	1	1
Central	Female	61_140	No	Yes	No	Live	1	1
Central	Male	61_140	No	Yes	No	Live	1	1
Central	Female	61_140	No	Yes	No	Live	1	1
South	Male	20_40	No	No	No	Death	1	1
Central	Female	20_40	Yes	No	No	Live	1	1
Central	Female	20_40	Yes	No	No	Live	1	1
Central	Female	20_40	Yes	No	No	Live	1	1
Central	Female	41_60	Yes	Yes	No	Live	1	1
Central	Female	61_140	No	Yes	No	Death	1	1
Central	Female	20_40	Yes	No	No	Live	1	1
Central	Female	41_60	Yes	Yes	No	Live	1	1
South	Male	61_140	No	Yes	No	Live	1	1
East	Male	61_140	No	Yes	No	Death	1	1
Central	Female	61_140	No	Yes	No	Live	1	1
Central	Female	61_140	No	Yes	No	Live	1	1
Central	Male	20_40	No	Yes	No	Live	1	1
South	Male	20_40	No	Yes	No	Live	1	1
Central	Female	41_60	Yes	Yes	No	Live	1	1
South	Male	41_60	No	Yes	No	Death	0	1
East	Male	41_60	No	Yes	No	Live	1	1
Central	Male	41_60	No	No	No	Live	1	1
Central	Male	61_140	No	Yes	No	Live	1	1
Central	Male	41_60	No	Yes	No	Live	1	1
Central	Male	41_60	No	Yes	No	Live	1	1
East	Male	61_140	No	Yes	No	Death	0	1
East	Male	41_60	No	Yes	No	Death	1	1
North	Male	20_40	No	Yes	No	Live	1	1
Central	Female	41_60	No	Yes	No	Live	1	1
Central	Male	61_140	No	Yes	No	Death	1	1
East	Male	61_140	No	Yes	No	Live	1	1
Central	Male	61_140	No	Yes	No	Live	1	1
Central	Male	41_60	No	No	No	Live	1	1
Central	Male	61_140	No	Yes	No	Live	1	1
East	Male	41_60	No	No	No	Live	1	1
Central	Male	61_140	No	Yes	No	Death	0	1
East	Male	41_60	No	Yes	No	Death	1	1
North	Male	61_140	No	Yes	No	Death	0	1
East	Female	20_40	No	No	No	Live	1	1
West	Male	41_60	No	Yes	No	Live	1	1
Central	Male	41_60	No	Yes	No	Death	1	1
East	Female	41_60	No	Yes	No	Death	1	1
West	Male	61_140	No	Yes	No	Live	1	1
South	Male	61_140	No	Yes	No	Death	0	1
West	Male	20_40	No	No	No	Live	1	1
West	Male	61_140	No	Yes	No	Live	1	1
Central	Male	41_60	No	Yes	No	Death	0	1
South	Male	41_60	No	Yes	No	Live	1	1
Central	Male	61_140	No	Yes	No	Death	1	1
East	Male	20_40	No	Yes	No	Live	1	1
Central	Male	41_60	No	Yes	No	Live	1	1
Central	Female	41_60	No	Yes	No	Live	1	1
Central	Male	41_60	No	No	No	Live	1	1
